1       **Artificially stimulating retrotransposon activity increases**  
2       **mortality and accelerates a subset of aging phenotypes in**  
3                               ***Drosophila***

4  
5       Joyce Rigal<sup>1</sup>, Ane Martin Anduaga<sup>1</sup>, Elena Bitman<sup>1</sup>, Emma Rivellese<sup>1</sup>, Sebastian  
6       Kadener<sup>1</sup>, Michael T. Marr II<sup>1, #, +</sup>

7  
8  
9       <sup>1</sup> Biology Department, Brandeis University, Waltham, MA, 02454, USA.

10  
11  
12  
13  
14  
15  
16  
17  
18  
19  
20  
21

# To whom correspondence should be addressed

Michael T. Marr II [mmarr@brandeis.edu](mailto:mmarr@brandeis.edu)

+ Lead Contact

22 **ABSTRACT:**

23 Transposable elements (TE) are mobile sequences of DNA that can become  
24 transcriptionally active as an animal ages. Whether TE activity is simply a byproduct of  
25 heterochromatin breakdown or can contribute towards the aging process is not known.  
26 Here we place the TE *gypsy* under the control of the UAS GAL4 system to model TE  
27 activation during aging. We find that increased TE activity shortens the lifespan of male  
28 *D. melanogaster*. The effect is only apparent in middle aged animals. The increase in  
29 mortality is not seen in young animals. An intact reverse transcriptase is necessary for  
30 the decrease in lifespan implicating a DNA mediated process in the effect. The decline  
31 in lifespan in the active *gypsy* flies is accompanied by the acceleration of a subset of  
32 aging phenotypes. TE activity increases sensitivity to oxidative stress and promotes a  
33 decline in circadian rhythmicity. The overexpression of the Forkhead-box O family  
34 (FOXO) stress response transcription factor can partially rescue the detrimental effects  
35 of increased TE activity on lifespan. Our results provide evidence that active TEs can  
36 behave as effectors in the aging process and suggest a potential novel role for dFOXO  
37 in its promotion of longevity in *D. melanogaster*.

## 38 INTRODUCTION

39 Aging leads to a progressive loss of physiological integrity that culminates in a  
40 decline of function and an increased risk of death (López-Otín et al., 2013). It is a  
41 universal process that involves the multifactorial interaction of diverse mechanisms that  
42 are not yet fully elucidated. Transposable elements (TE) are among the many factors  
43 that have been proposed to be involved in aging (Morley, 1995; Wood & Helfand, 2013).  
44 TE are present in every eukaryotic genome sequenced to date (García Guerreiro, 2012;  
45 Huang et al., 2012). They are sequences of DNA that can move from one place to  
46 another (McCLINTOCK, 1950), either by reverse transcription and insertion into the  
47 genome (Class 1: Retrotransposons), or through direct excision and movement of the  
48 element (Class 2: DNA TE) (McCullers & Steiniger, 2017).

49 Multiple studies (Gorbunova et al., 2021) report that TE mRNA levels increase in  
50 the aging somatic tissue of flies (Giordani et al., 2021; Li et al., 2013; Wood et al.,  
51 2016), termites (Elsner et al., 2018), mice (De Cecco, Criscione, Peterson, et al., 2013),  
52 rats (Mumford et al., 2019) and humans (LaRocca et al., 2020). A direct correlation to  
53 an increase in genomic copy number has been difficult to determine (Treiber & Waddell,  
54 2017; Yang et al., 2022). Nonetheless, clear evidence for an increase of TE somatic  
55 insertions with age has been obtained using reporter systems. Two reporter systems for  
56 insertions of the long-terminal-repeat (LTR) retrotransposon *gypsy* demonstrate that  
57 *gypsy* insertions increase during aging in the *D. melanogaster* brain and fat body (Y.-H.  
58 Chang et al., 2019; Li et al., 2013; Wood et al., 2016).

59 TE movement in somatic tissue has been proposed to be a driver of genomic  
60 instability (Ivics & Izsvák, 2010) and potentially aging (Morley, 1995; Wood & Helfand,  
61 2013; Woodruff & Nikitin, 1995). Additionally, TE activity has been reported to cause  
62 disease in humans (Hancks et al., 2012). Current research reports that long-  
63 interspersed-element-1 (*L1*) activity itself, without an increase in insertions, can trigger  
64 an inflammation response that contributes to aging related phenotypes in human  
65 senescent cells (Cecco et al., 2019). In aged mice, the use of reverse transcriptase  
66 inhibitors can downregulate this age associated inflammation (Cecco et al., 2019)  
67 implicating retrotransposons. The shortened lifespan of a Dicer-2 (*dcr-2*) mutant fly  
68 strain, which has an increase of TE expression, can also be extended by the use of  
69 reverse transcriptase inhibitors (Wood et al., 2016). In summary, current evidence  
70 suggests a role for TE activity in aging.

71 However, whether the role of TE activity is as effector or bystander of the aging  
72 process is an open question. As an animal ages, heterochromatin repressive marks  
73 decrease and resident silent genes can become expressed (Jiang et al., 2013). TE  
74 sequences are enriched in silent heterochromatin and thus become expressed (De  
75 Cecco, Criscione, Peckham, et al., 2013). This raises the question of whether TE  
76 expression is simply a byproduct of age-related heterochromatin breakdown or if TE  
77 themselves can contribute to the aging process. To date, this has not been directly  
78 assayed.

79 To combat the effects of TE activity, cells have evolved small RNA pathways to  
80 maintain silencing of TE. The PIWI pathway dominates in the germline while the

81 somatic tissue of *Drosophila* is thought to mainly rely on the siRNA pathway (Hyun,  
82 2017). This pathway is based on Dicer-2 cleaving double stranded (ds) RNA precursors,  
83 generally viral genomes or TE dsRNA, into small RNAs that are loaded into Ago2  
84 guiding the RNA Induced Silencing Complex (RISC) to cleave its targets (Hyun, 2017).  
85 In *D. melanogaster*, endogenous siRNAs in RISC mapping to TE loci have been  
86 reported (Czech et al., 2008; Ghildiyal et al., 2008; Kawamura et al., 2008). The  
87 mutation, knockdown, or depletion of genes involved in the siRNA pathway such as *Dcr-*  
88 *2* (Lee et al., 2004) and *AGO2* (Okamura et al., 2004) leads to increased expression of  
89 TE in somatic cells and a shortened lifespan (Kawamura et al., 2008; Czech et al.,  
90 2008; Chung et al., 2008; Lim et al., 2011; Li et al., 2013; Wood et al., 2016; Chen et al.,  
91 2016). On the other hand, the overexpression of *Dcr-2* (Wood et al., 2016) and *AGO2*  
92 (Yang et al., 2022) in adult fly somatic tissue can lower TE expression and extend  
93 lifespan. Taken together, these results suggest TE activity can influence lifespan. The  
94 effect of TE activity on lifespan has not been directly determined.

95         The Forkhead-box O family (FOXO) is an evolutionarily conserved transcription  
96 factor capable of enhancing longevity by enabling the cell to respond to diverse stress  
97 signals (Calnan & Brunet, 2008). The longevity effects of FOXO have been reported in  
98 worms, flies, and mice (Martins et al., 2016). FOXO activity can enable transcriptional  
99 responses to provide protective effects against cellular stress: oxidative stress, heat  
100 shock, virus infection, and defects in protein homeostasis among many others  
101 (Donovan & Marr, 2016; Martins et al., 2016; Spellberg & Marr, 2015). Whether TE  
102 activity is a condition that FOXO activity might protect against is unknown.

103           In this study we have set up a system to directly assay if TE can become active  
104 contributors of the aging process. For this, we placed the retrotransposon *gypsy* (Bayev  
105 et al., 1984), which will be used as a candidate to model TE activity during aging, under  
106 the control of the UAS GAL4 system (Brand & Perrimon, 1993). The retrotransposon  
107 *gypsy* is a TE that has been clearly shown to become active in aged *D. melanogaster*  
108 somatic tissue under natural conditions (Li et al., 2013; Wood et al., 2016). In our  
109 system, we find that active TE expression significantly increases the mortality in middle  
110 aged flies and that an intact reverse transcriptase is necessary for this effect. The  
111 increase in mortality is accompanied by acceleration of a subset of aging-related  
112 phenotypes. We find that the FOXO homologue in *Drosophila* (dFOXO) can counteract  
113 and partially rescue the decrease in lifespan generated by an active TE, suggesting a  
114 possible novel mechanism through which dFOXO might promote longevity in *D.*  
115 *melanogaster*.

## 116 **RESULTS**

117           To determine dFOXO's possible involvement in TE regulation we sequenced the  
118 RNA from whole animals of 5-6 days (d) and 30-31d old *w<sup>DAH</sup>* (wt) and dFOXO deletion  
119 (*w<sup>DAH</sup> Δ<sup>94</sup>*) males (Slack et al., 2011). These lines have been extensively backcrossed,  
120 making them isogenic other than for the dFOXO deletion (Slack et al., 2011). In these  
121 conditions, the wt animals display significant increased expression of two TEs (*1731*  
122 and *Doc4*) and decreased expression of two additional TEs (*Stalker2* and *G6*) with age  
123 (Fig. 1a, 1b and 1-S1). By contrast, in the dFOXO deletion animals, 18 TEs exhibited a  
124 significant increase in expression with age (Fig. 1c, 1d and 1-S2) while no TE

125 expression decreased with age indicating the overall TE load is greater in the aged  
126 dFOXO deletion flies.

127         The vast majority of TE expression levels in both strains fall within the observed  
128 range of average gene expression (Fig. 1a and Fig. 1d). Total TE expression undergoes  
129 a small change overall in both genotypes. Expression increased only 1.2-fold with age  
130 (Fig. 1-Table S1) in wt flies and 1.41-fold in dFOXO null flies (Fig. 1-Table S2). Of the  
131 two TE that increased with age in wt flies, only *1731* exhibits an increase in dFOXO null  
132 flies. Among the two TE that decreased with age in wt, *G6* showed the opposite effect  
133 on expression in dFOXO null flies while *Stalker2* showed no change with age in dFOXO  
134 null flies. The direct comparison of individual TE expression levels in young wt and  
135 dFOXO null flies indicates that despite being backcrossed (Slack et al., 2011) different  
136 TE are being expressed in each strain (Fig. 1e). This means that the otherwise isogenic  
137 lines have a different transcriptionally active TE landscape. Therefore, beyond the  
138 comparison of the number of transcriptionally active TE, a direct comparison between  
139 wt and dFOXO null flies to determine the effect of dFOXO on any specific TE  
140 expression during aging is challenging.

141 **Figure 1. TE expression increases with age in FOXO null flies.**

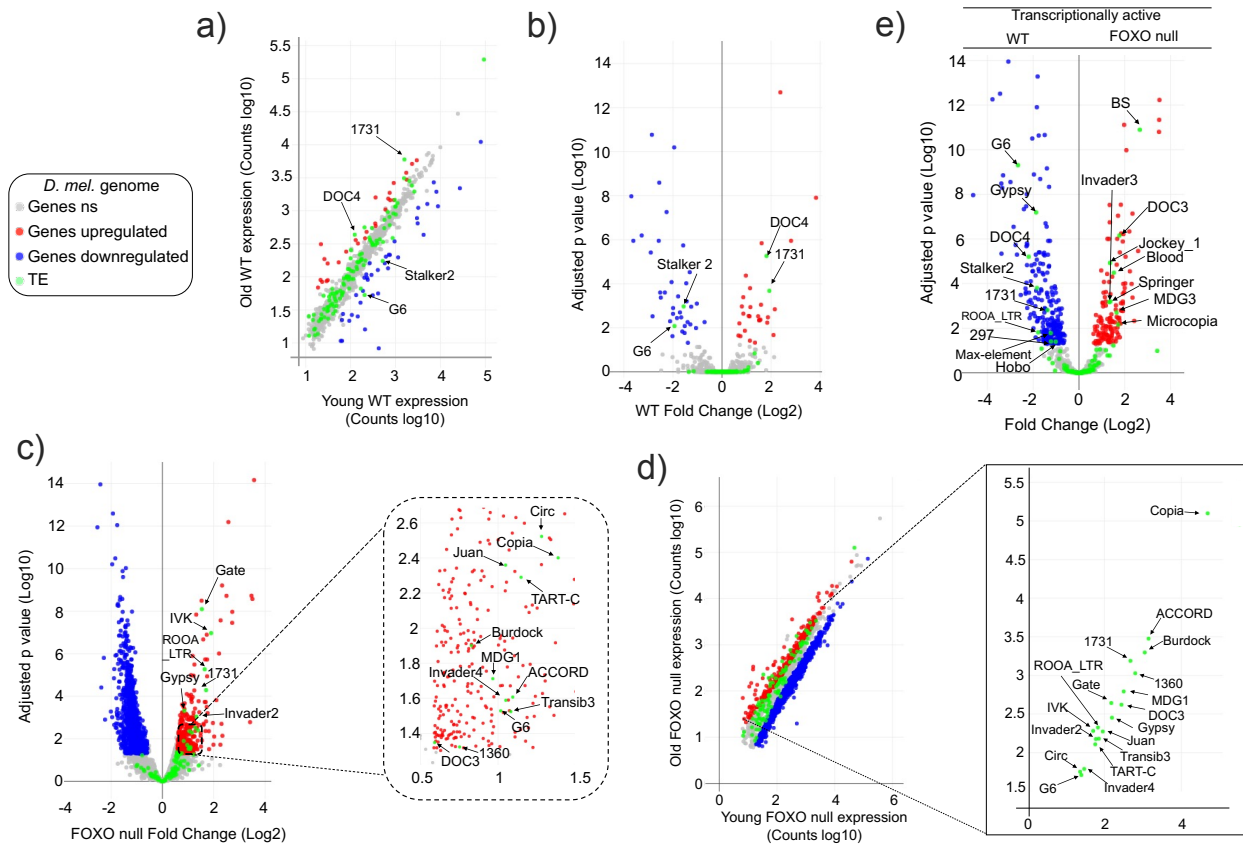

142

143 **Figure 1. TE expression increases with age in FOXO null flies.** Data represents RNAseq from 3  
 144 biological replicates (10 male flies per sample). Young – 5 days, Old – 30 days. Legend (grey: fly  
 145 genes not significant (ns), red: upregulated fly genes, blue: downregulated fly genes, green: TE).  
 146 Differential expression indicates a 1.5-fold change or higher and an adjusted p value < 0.05, as  
 147 determined by DESeq2. a-d) Red indicates upregulation with age. Blue denotes downregulation with  
 148 age. Significantly different TE are identified by name. a-b) Wildtype (WT) control. 4 TE are labelled.  
 149 c-d) FOXO null. 18 TE are labelled. e) Volcano plot of young WT control and young FOXO null. Red  
 150 and blue dots indicate gene relative expression in FOXO null compared to WT, respectively. TE are  
 151 marked by green dots. Adjusted p values for each TE are provided in Figure 1-Table supplement 1  
 152 (WT) and Figure 1-Table supplement 2 (FOXO null)



153 Our difficulties to determine the effect of dFOXO on any specific TE highlights the  
154 need for a controlled system to test TE expression and regulation during aging. The  
155 *gypsy* retrotransposon was selected as a model system to study TE activity and we  
156 developed a UAS-*gypsy* system. The structure of the ectopic UAS-*gypsy* system is  
157 depicted in Fig. 2a. A direct comparison to the endogenous *gypsy* element can be  
158 observed in a simplified overview of three broad stages in the *gypsy* lifecycle (parental  
159 element, propagation through transcription and reverse transcription, and new  
160 insertion). The presence of the UAS promoter in the ectopic *gypsy* allows the control of  
161 *gypsy* expression by mating to a GAL4 expressing strain. In addition, we inserted a  
162 unique sequence tag in the 3' LTR of the ectopic *gypsy* to differentiate it from the  
163 endogenous copy of *gypsy* (Bayev et al., 1984, p. 4). We inserted the UAS-*gypsy*  
164 construct in the VK37 attP site on chromosome 2 using the PhiC31 system (Venken et  
165 al., 2006). Using this approach, we found that ectopic *gypsy* expression is significantly  
166 induced when the line is crossed to a strain in which *gal4* is ubiquitously expressed  
167 under the *ubiquitin* promoter (*Ubi>gypsy*) (Fig. 2b).

168 This tag also allows us to take advantage of the strand transfer that occurs  
169 during reverse transcription of the retroelement before integrating into a new site in the  
170 genome. This process replaces the UAS sequence with a 5' LTR and transfers the  
171 sequence tag to the new LTR of the newly integrated *gypsy* element (Weaver, 2008)  
172 (Fig. 2a). Using this approach, we found that new insertions are created and can be  
173 specifically detected (Fig. 2c) when UAS-*gypsy* is expressed (*Ubi>gypsy* genotype).  
174 The junction between the recombinant *gypsy* 5' LTR and the *gypsy* provirus sequence  
175 is only formed when a complete insertion is made. Sanger sequencing of the qPCR

176 insertion products demonstrates the specific detection of this junction, indicating that the  
177 UAS-gypsy element can transpose and is an active TE element (Fig. 2d).

178 **Figure 2. UAS-gypsy structure and functional test.**

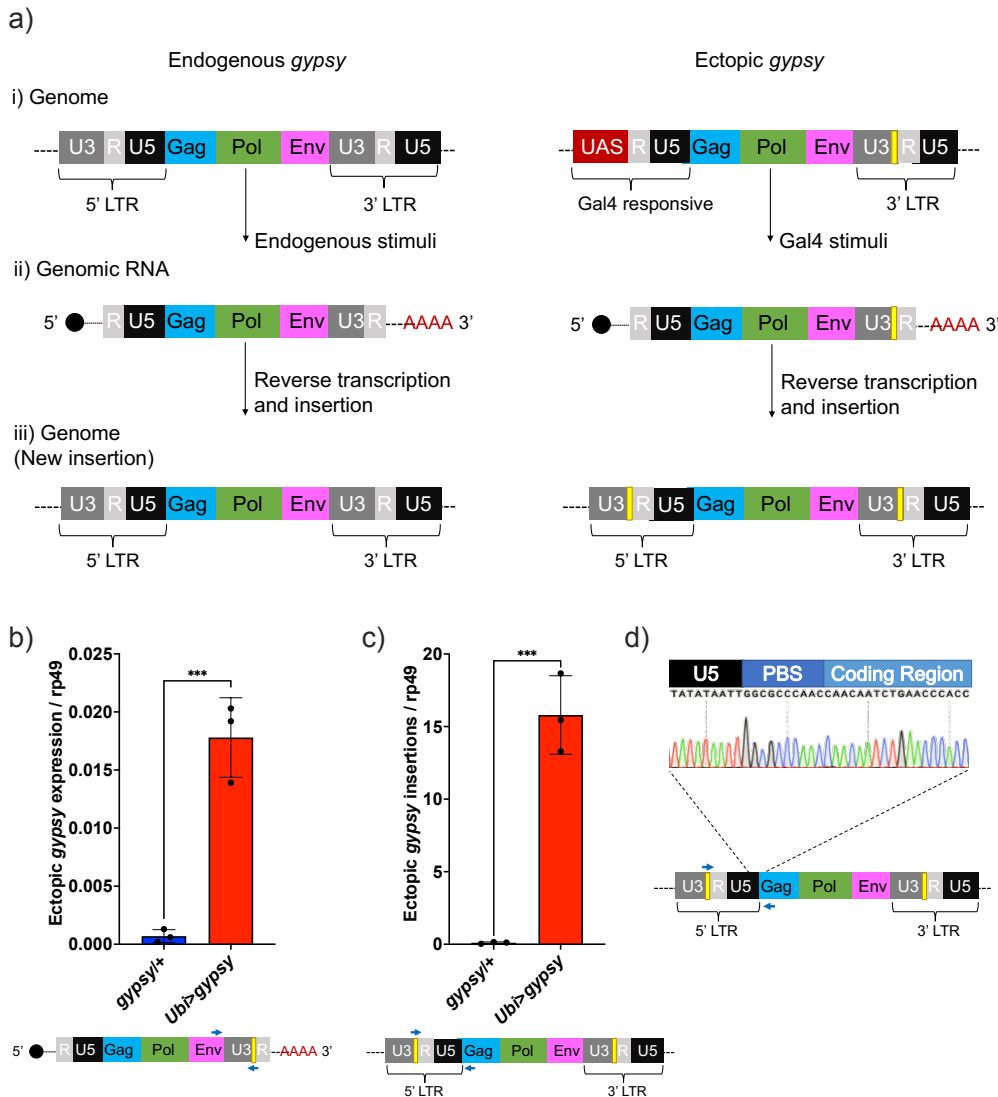

179

180 **Figure 2. UAS-gypsy structure and functional test.** a) Simplified overview of 3 stages of the  
 181 *gypsy* retrotransposon lifecycle, i) parent insertion in the genome, ii) the transcribed RNA (genomic  
 182 RNA), and iii) the new copy inserted in the genome. The difference between the wildtype *gypsy* and  
 183 ectopic *gypsy* resides in both its 5' and 3' LTR. The presence of an upstream activating sequence  
 184 (UAS) in the 5' LTR allows *gypsy* to be transcribed in response to a Gal4 stimuli. In the 3' LTR, the  
 185 addition of a unique sequence of DNA (denoted by a yellow square) not found in the *D.*  
 186 *melanogaster* genome allows quantification and tracking of new insertions by molecular methods. b)  
 187 RT-qPCR of 5-day old males. 3' end of ectopic *gypsy* transcript is detected. Data are represented as  
 188 means  $\pm$  SD (3 biological replicates, each dot is a pool of 5 flies). One-tailed t test, \*\*\* p value  
 189 0.0005. c) gDNA qPCR of 5-day old males. Ectopic *gypsy* provirus insertion junctions are detected.  
 190 Data are represented as means  $\pm$  SD (3 biological replicates, each dot is a pool of 10 flies). One-  
 191 tailed t test, \*\*\* p value 0.0003. d) Sanger sequencing of the newly created ectopic *gypsy* provirus  
 192 insertion junction in *Ubi>gypsy* flies.

193 To characterize the spectrum of insertion sites of the UAS-*gypsy* construct we  
194 took a targeted sequencing approach. Using a biotinylated primer hybridizing with the  
195 unique sequence tag oriented to read out from the newly integrated 5' LTR we created  
196 Illumina Next generation sequencing libraries to sequence the genomic junctions (Fig.  
197 3-S1a). Libraries were prepared from three biological replicates of ten 14-day old male  
198 flies each. Sequencing reads were sorted using the LTR sequence as a barcode. After  
199 removing the LTR sequence, the exact site of insertion was mapped back to the  
200 *Drosophila* reference genome. More than 11,000 insertion sites were identified. Sites  
201 were identified in all chromosomes with the fraction of insertions roughly correlating with  
202 the size of the chromosome (Fig. 3A). Comparing the insertion sites with the genome  
203 annotation allowed us to classify the insertion sites. Sixty-six percent of the mapped  
204 insertion sites are in transcribed regions (Fig. 3B). Of those sites, the majority are in  
205 intronic regions (Fig. 3C). Because the data provides nucleotide resolution, we could  
206 also determine the six-nucleotide target site duplication that occurs at the junction  
207 between the *gypsy* LTR and the genome upon insertion (Dej et al., 1998). The target  
208 site duplication consensus determined from our mapped insertion sites matches the  
209 known YRYRYR previously identified for *gypsy* integration sites (Figure 3D) (Dej et al.,  
210 1998). To determine the distribution of the insertions sites we divided the largest  
211 chromosome arms (3R, 3L, 2R, 2L, X) into roughly 1 megabase bins and counted the  
212 number of insertions per bin. Then we plotted the fraction of the total insertions on that  
213 chromosome arm in each bin. A plot for the arms of chromosome 3 is shown in figure  
214 3E. The plots of the other chromosomes are in the supplemental figure 3-S1b. At this  
215 level of resolution, insertions are detected roughly evenly across the chromosomes.

216           The feasibility of the system allowed us to test whether TE activity could affect  
217 lifespan. We set up three independent cohorts to measure lifespan. The assays were  
218 performed at different times of the year. We consistently found that the somatic  
219 expression of an active *gypsy* significantly decreased the lifespan of male flies (Fig. 4a).  
220 The individual cohorts showed a consistent effect on lifespan and the merged data was  
221 used to analyze the effect. A 19% reduction of lifespan in the active *gypsy* male flies is  
222 observed compared to parental controls, with a median survival of 70 days and 86 days,  
223 respectively. A lifespan effect was also observed in females, surprisingly it was also  
224 present in the UAS-*gypsy* parental control (Fig. 4-S1). Interestingly, a molecular assay  
225 demonstrates that more detected insertions are present in female UAS-*gypsy* controls  
226 than their male equivalents (Fig. 4-S2). An additional molecular assay was done in the  
227 *Ubi>gypsy* genotype to look at the distribution of detected insertions between the head  
228 and body (Fig. 4-S3). No significant difference was detected in male flies, indicating an  
229 equivalent level of insertions throughout somatic tissue. In females, however, a  
230 significant bias toward insertions in the body was detected, indicating possible  
231 differential expression of UAS-*gypsy* in the mixed tissues. Due to the confounding  
232 effects of the system observed in female flies (lifespan defect in parental UAS-*gypsy*  
233 control and differential distribution of detected insertions in *Ubi>gypsy*) male flies were  
234 used for all following experiments. The lifespan effect on the *Ubi>gypsy* flies only  
235 becomes apparent once the flies start to age. At 26 days old the survival curves  
236 noticeably separate from the parental controls and calculation of the age specific  
237 mortality shows a significant increase in mortality present in 26 to 75 day old animals  
238 (Fig. 4b-e).

239 Ectopic *gypsy* DNA was detected at different ages in the survival curve (5, 14,  
240 30, 50, and 70 days old) with three different primer pairs. In Figure 5a, the recombinant  
241 5' LTR *gypsy* junction is targeted to detect complete ectopic *gypsy* elements. In Figure  
242 5b, the 3' fragment of ectopic *gypsy* is targeted for detection. The 3' fragment comprises  
243 the region between the *env* gene and the tag in the 3' LTR. Complete and incomplete  
244 *gypsy* elements are quantified by this approach. In Figure 5c, the wildtype *gypsy* *env*  
245 region is targeted. This approach captures both the endogenous and ectopic *gypsy*  
246 content in the genome. Of the three approaches, the detection of the 5' LTR *gypsy*  
247 junction (Fig. 5a) is the most stringent because only complete *gypsy* elements are  
248 detected. This is reflected in the smaller content of ectopic *gypsy* DNA detected  
249 compared to the 3' fragment assay which detects both complete and incomplete *gypsy*  
250 elements (Fig 5b-c). The three approaches detect a relatively constant level of DNA  
251 while the animals are young with a surprising decrease in detection of ectopic *gypsy*  
252 DNA in older animals. Interestingly, ectopic *gypsy* RNA expression remains constant  
253 throughout the assayed timepoints (Fig. 5d). Although variability increases greatly with  
254 age.

255 The effect on lifespan caused by TE activity could be due to the process of  
256 retrotransposition through a DNA intermediate or by disruption of RNA homeostasis.  
257 One way to address this is to remove the DNA synthesis step and test if TE RNA  
258 presence alone can mediate the decrease in lifespan. This led us to test whether the  
259 lifespan effect would be present after deleting the reverse transcriptase (RT) from the  
260 UAS-*gypsy* polyprotein. We created a UAS-*gypsy* construct that contains an in-frame  
261 deletion in the polyprotein that removes most of the RT (Marlor et al., 1986) and

262 inserted it in the same attP landing site on chromosome 2 (UAS- $\Delta$ RT). The deletion of  
263 RT in the UAS-*gypsy* transgene prevents the lifespan effect observed when crossed to  
264 *Ubi-gal4* (*Ubi*> $\Delta$ RT genotype) (Fig 6a). This is not due to a defect in mRNA levels  
265 because RT-qPCR indicates that *Ubi*> $\Delta$ RT and *Ubi*>*gypsy* express the transposon RNA  
266 at the same level (Fig. 6b). Consistent with the loss of RT activity, we detect no increase  
267 in ectopic *gypsy* 3' DNA in the *Ubi*> $\Delta$ RT line despite expressing equivalent levels of  
268 mRNA as *Ubi*>*gypsy* (Fig. 6c). This result indicates that an active RT is required for the  
269 observed decrease in lifespan seen when *gypsy* is ectopically expressed in somatic  
270 tissue.

271 **Figure 3. NGS mapping of ectopic *gypsy* insertions**

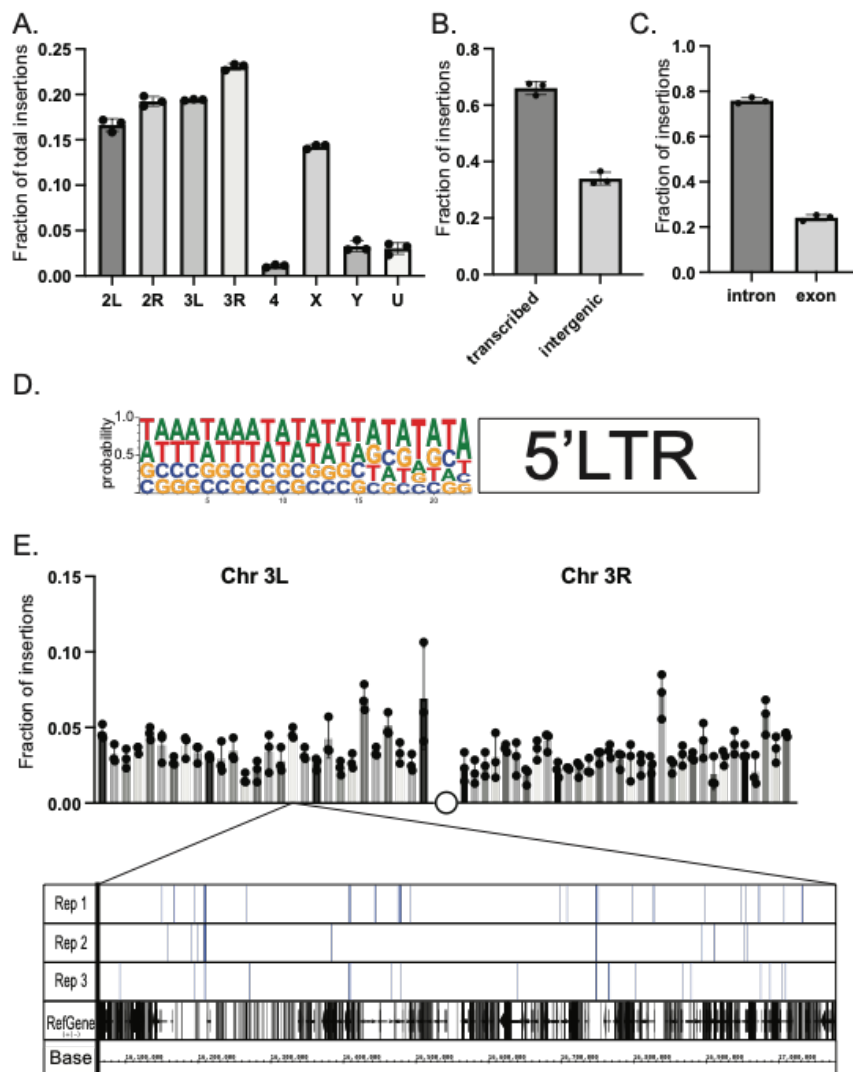

272  
 273 **Figure 3. NGS mapping of ectopic *gypsy* insertions.** **A.** The average fraction of total insertions is  
 274 shown for each chromosome (4, X, Y) or chromosome arm (2L, 2R, 3L, 3R). In addition, the fraction  
 275 mapping to unplaced contigs is indicated as U. **B.** The fraction of total reads mapping to transcribed  
 276 regions of the genome and intergenic regions is graphed. **C.** The fraction of insertions that map to  
 277 the transcribed regions of the genome are subdivided. Insertions mapping to regions annotated as  
 278 introns or exons is graphed. **D.** The sequences of the junction of the new 5' LTR and the *Drosophila*  
 279 genome were aligned and used to determine the probability of finding each base at each position.  
 280 These probabilities are indicated by the size of the letter at each position. **E.** The fraction of  
 281 insertions that map to each one megabase region of the reference genome for the arms of  
 282 chromosome 3 are plotted. For illustration, a genome browser view of the 1Mb in Chr3L is shown.  
 283 The insertion sites in that region for each replicate is indicated. A collapsed track showing genes in  
 284 that region is also shown. For all histograms, the bars represent the average of three biological  
 285 replicates. Error bars indicate the standard deviation and the filled circles indicate the individual  
 286 measurements. Each replicate is a pool of 10 male 14 day-old flies



287 **Figure 4. Ectopic *gypsy* expression decreases lifespan during old age**

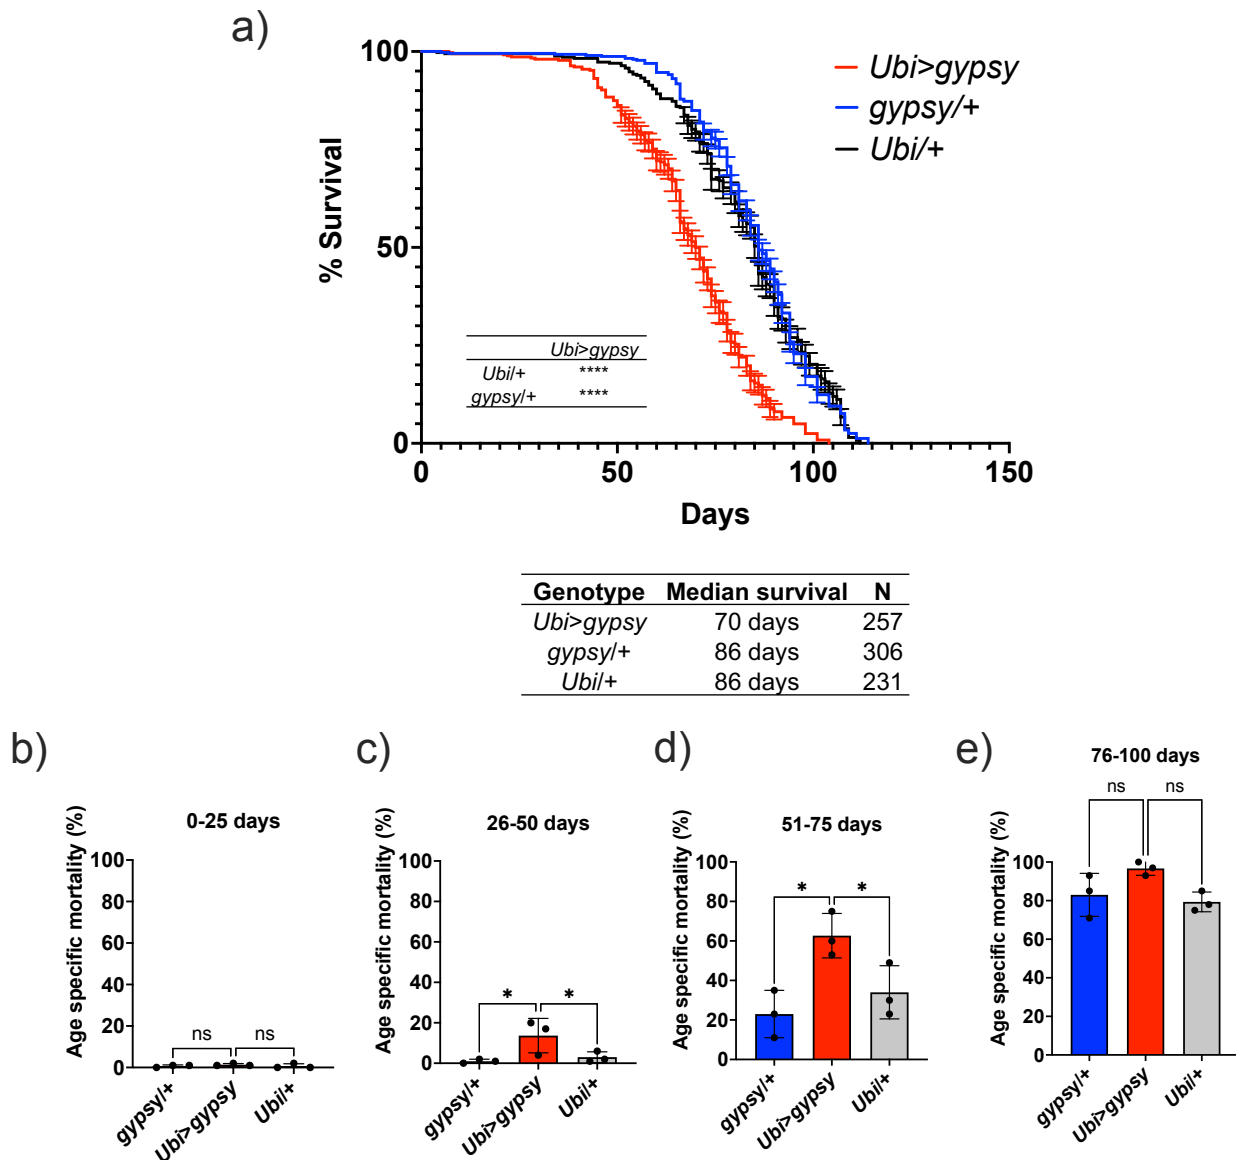

288  
 289 **Figure 4. Ectopic *gypsy* expression decreases lifespan during old age.** a) Survival curves of  
 290 male flies expressing *gypsy* under the control of *Ubiquitin* Gal4 (Red) and the parental controls:  
 291 *gypsy/+* (Blue) and *Ubi/+* (Black). Data represents 3 biological replicates (independent cohorts done  
 292 at different times of year), error bars SE. \*\*\*\* p value <0.0001, Log-rank test. b-e) Data are  
 293 represented as means  $\pm$  SD (individual measurements are shown as dots, age specific mortality was  
 294 calculated for each cohort independently). One-way ANOVA, adjusted p value: 26-50 days (*gypsy/+*  
 295 0.047, *Ubi/+* 0.047), adjusted p value 51-75 days (*gypsy/+* 0.015, *Ubi/+* 0.030), ns (not significant).

296 **Figure 5. Ectopic *gypsy* DNA does not increase with age.**

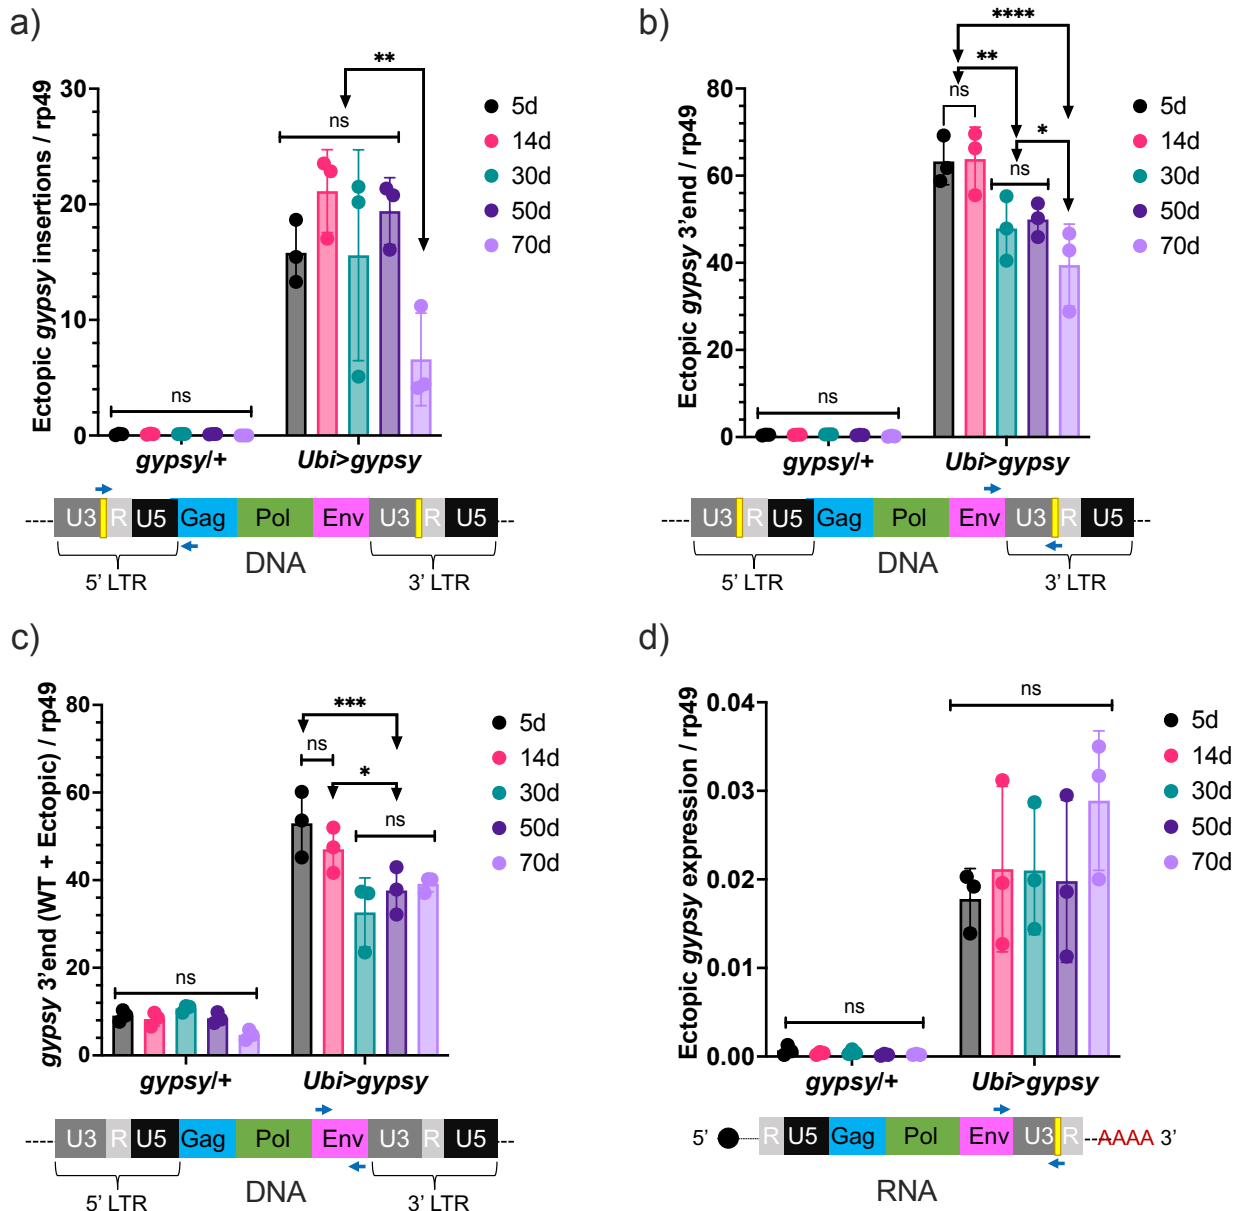

297

298 **Figure 5. Ectopic *gypsy* DNA does not increase with age.** a-c) gDNA qPCR of male flies at  
 299 different ages (5d, 14d, 30d, 50d and 70d). Data are represented as means  $\pm$  SD (3 biological  
 300 replicates, each dot is a pool of 10 flies). 2way ANOVA, \*\*\*\* adjusted p value < 0.0001, \*\* adjusted p  
 301 value < 0.01, \* adjusted p value < 0.05. a) Ectopic *gypsy* provirus junctions are detected. b) 3' end of  
 302 ectopic *gypsy* fragments are detected. c) Wildtype (WT) and ectopic *gypsy env* fragments are  
 303 detected. d) RT-qPCR of male flies at different ages (5d, 14d, 30d, 50d and 70d). 3' end of ectopic  
 304 *gypsy* transcript is detected. Data are represented as means  $\pm$  SD (3 biological replicates, each dot  
 305 is a pool of 5 flies). 2way ANOVA, not significant (ns).

306 **Figure 6. Decrease in lifespan requires reverse transcriptase activity.**

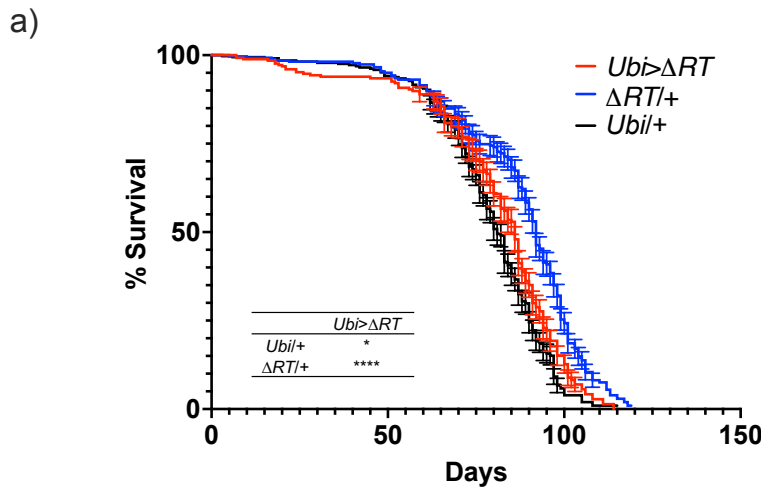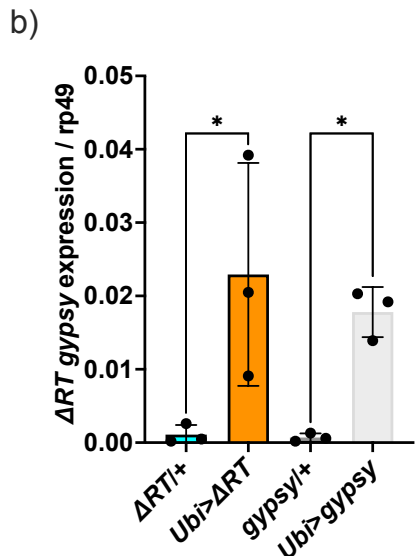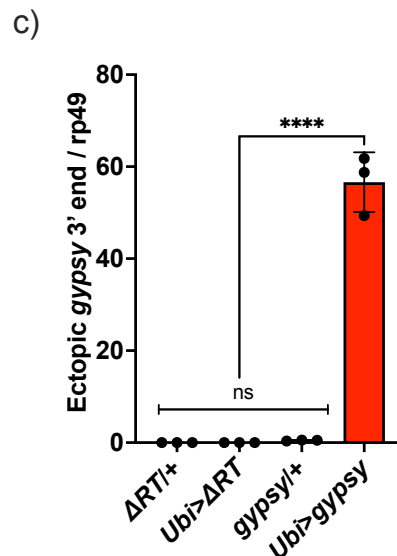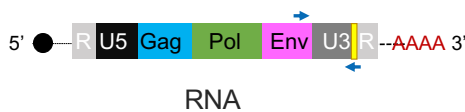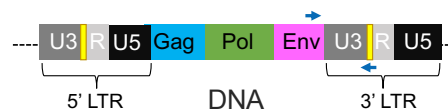

307  
 308 **Figure 6. Decrease in lifespan requires reverse transcriptase activity.** a) Survival curves of male  
 309 flies expressing  $\Delta RT$  gypsy under the control of *Ubiquitin* Gal4 (Red) and the parental controls:  $\Delta RT$   
 310 gypsy/+ (Blue) and *Ubi*+ (Black). Data represents 2 biological replicates (staggered independent  
 311 cohorts), error bars SE. \*\*\*\* p value <0.0001, \* p value 0.016, Log-rank test. b-c) Data are  
 312 represented as means  $\pm$  SD (3 biological replicates, each dot is a pool of 5 flies). *gypsy*+ and  
 313 *Ubi>gypsy* data are replotted from Fig. 2 b-c, respectively. b) RT-qPCR of 5-day old males. 3' end of  
 314 ectopic gypsy transcript is detected. One-way Anova,  $\Delta RT/+$  vs. *Ubi>ΔRT* \* adjusted p value 0.012,  
 315 *gypsy*+ vs. *Ubi>gypsy* \* adjusted p value 0.029. c) gDNA qPCR of 5-day old males. 3' end of  
 316 ectopic gypsy fragments is detected. Ordinary one-way Anova, \*\*\*\* adjusted p value <0.0001.

317 To determine if the decrease in lifespan of the active *gypsy* flies was  
318 accompanied by an acceleration of aging associated phenotypes, we decided to test if  
319 the ectopic expression of the *gypsy* TE resulted in the early emergence of any aging  
320 hallmarks. In particular, we focused on four different phenotypes that appear in normal  
321 aging flies (decreased resistance to dietary paraquat (Arking et al., 1991), decline in  
322 negative geotaxis (Rhodenizer et al., 2008), decrease of total activity (Sun et al., 2013)  
323 and disruption of circadian phenotypes (Curran et al., 2019; Rakshit et al., 2012).

324 For the paraquat resistance assays, 5, 15, 30 and 50 day old flies were exposed  
325 to 20 mM paraquat. As expected, resistance to paraquat exposure decreased with age  
326 in all genotypes (Fig. 7a). Interestingly, the survival curve of the 5-day old active *gypsy*  
327 flies mimicked that of the 15-day old parental control curves. Meanwhile the 15-day old  
328 active *gypsy* flies had a significant decrease in resistance to paraquat exposure when  
329 compared to age matched parental controls. However, once the flies are 30 and 50  
330 days old it appears TE activity can no longer exacerbate the oxidative stress survival as  
331 experimental and control flies die at a similar rate.

332 We also tested total activity as well as other well-characterized circadian  
333 phenotypes such as their ability to anticipate day and night, strength of their free-  
334 running conditions, or periodicity. Briefly, we placed 20, 30, or 40 day old flies into  
335 *Drosophila* Activity Monitors and recorded their total activity for over 10 days at 25°C in  
336 12:12 LD conditions. We did not find any significant decrease in the overall activity  
337 levels of the active *gypsy* flies compared to their parental controls at any of the  
338 assessed times (Fig. 7-S1). Simultaneously, a separate group of flies was entrained for

339 3 days to the same 12:12 LD conditions and then placed in free-running conditions in  
340 constant darkness (DD) to assess the strength of the endogenous clock on these flies.  
341 While no significant effect was found in their periodicity, the rhythmicity levels of the flies  
342 overexpressing *gypsy* was affected compared to those of their age-matched controls.  
343 84-97% of the control flies were rhythmic at all the assessed ages, whereas only 73-  
344 77% of the flies with ectopic expression of the TE remain rhythmic (Fig. 7b). Indeed,  
345 these flies also display a significant decline in their rhythmicity index throughout the  
346 assessed ages which does not happen in the control flies (Fig. 7c).

347 Finally, we also tested the ability of the flies with ectopic *gypsy* expression to  
348 move vertically when startled by performing a negative geotaxis assay. Briefly, we  
349 tapped the flies and recorded their location within a graduated cylinder for the following  
350 15s. We focused on the UAS parental control to select a height and time threshold  
351 optimal across different experimental ages (Fig. 7-S2). As a result and to capture  
352 possible subtle differences between the young flies and get a robust data capture even  
353 in older ages, we focused on the percentage of flies that climbed above the 7.5 cm  
354 threshold after 5 and 10 seconds. We examined the climbing ability of the active *gypsy*  
355 flies at four different ages (7d, 14d, 35d, 56d). As expected, we observed a decay of  
356 negative geotaxis with age. However, we did not detect any accelerated decay in the  
357 *gypsy* expressing flies when compared to parental controls (Fig. 7-S3).

358 **Figure 7. *gypsy* activity accelerates a subset of aging phenotypes.**

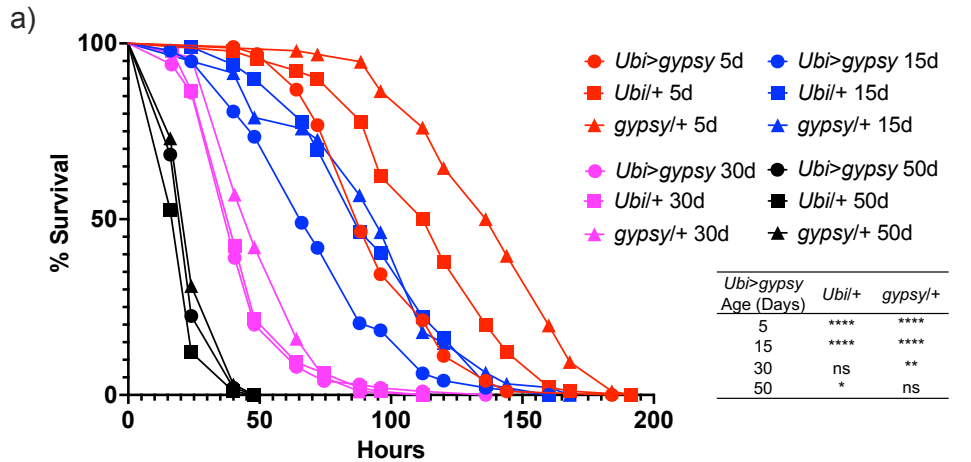

b)

| Genotype            | 20 days |              | 30 days |              | 40 days |              |
|---------------------|---------|--------------|---------|--------------|---------|--------------|
|                     | R % (n) | Period (SEM) | R % (n) | Period (SEM) | R % (n) | Period (SEM) |
| <i>gypsy/+</i>      | 97 (31) | 24.0 (0.19)  | 95 (22) | 23.9 (0.11)  | 84 (25) | 24.1 (0.11)  |
| <i>Ubi&gt;gypsy</i> | 73 (22) | 23.5 (0.16)  | 77 (22) | 23.8 (0.28)  | 75 (12) | 24.2 (0.55)  |
| <i>Ubi+</i>         | 86 (28) | 23.8 (0.11)  | 92 (24) | 24.11 (0.14) | 91 (11) | 23.9 (0.19)  |

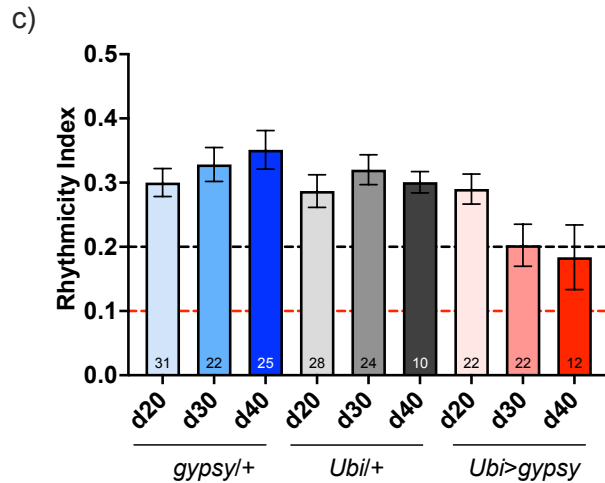

359  
 360 **Figure 7. *gypsy* activity accelerates a subset of aging phenotypes.** a) Survival curves of male  
 361 flies after exposure to 20mM paraquat at different ages (Red = 5d, Blue = 15d, Magenta = 30d, and  
 362 Black = 50d). Experimental flies expressing *gypsy* under the control of *Ubiquitin* Gal4 are  
 363 represented as circles. The parental controls *Ubi+* and *gypsy/+* are denoted squares and triangles,  
 364 respectively. Statistical significance is indicated on graph. \* p value 0.013, \*\* p value 0.006, \*\*\*\* p  
 365 value <0.0001, Log-rank test. b) Summary table of the percentage of rhythmic flies (R %) and their  
 366 period in DD. c) Rhythmicity levels of each genotype across the assessed ages ( $\pm$ SEM). *gypsy/+*  
 367 control, *Ubi>gypsy* experimental, and *Ubi+* control flies are represented in blue, red, and grey,  
 368 respectively. The black and red dotted lines mark the thresholds between what are considered highly  
 369 (RI>0.2) and weakly rhythmic, and arrhythmic flies (RI<0.1). The number at the bottom of each  
 370 column indicates the n.

371           Having created a system in which we can regulate the activity of a particular TE  
372 (*gypsy*) and having reported the effects of its accumulation upon lifespan and other  
373 aging hallmarks, we went back to our original question regarding the role of FOXO on a  
374 specific TE. The *Ubi-gal4* and *UAS-gypsy* lines were crossed to a *UAS-FOXO* line  
375 (Slack et al., 2011) to increase *dFOXO* expression in the animals. This leads to a 32%  
376 increase in the level of *dFOXO* mRNA in these animals (Fig. 8a). We find that increased  
377 expression of *dFOXO* can rescue the effect on lifespan due to *gypsy* activity. The 19%  
378 decrease in lifespan reported in Fig. 4a is reduced to 8% when compared to the *UAS*  
379 control and the lifespan matches the *gal4* control (Fig. 8b). Importantly, the effect is not  
380 simply due to a prevention of ectopic *gypsy* mRNA expression as the transcript remains  
381 significantly induced in the *dFOXO* overexpressing flies (Fig. 8c).

382 **Figure 8. Increasing FOXO activity can rescue longevity effect.**

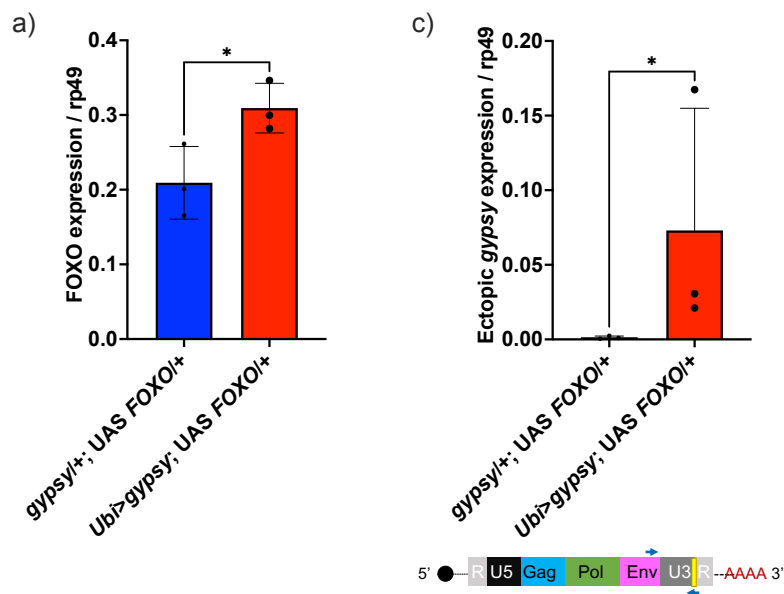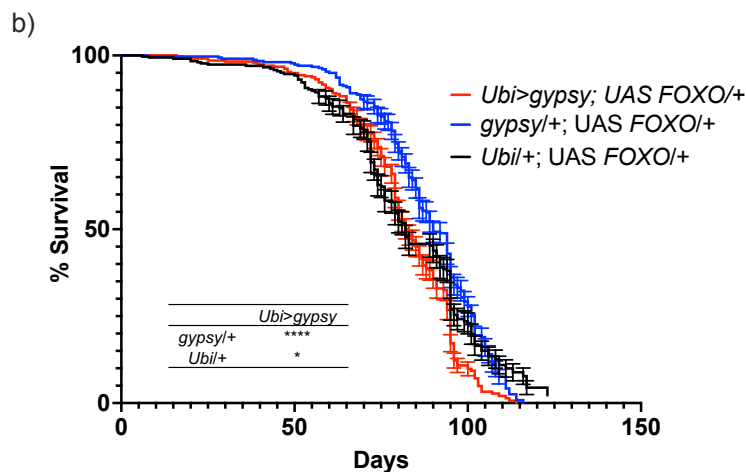

| Genotype                        | Median survival | N   |
|---------------------------------|-----------------|-----|
| <i>Ubi&gt;gypsy; UAS FOXO/+</i> | 83 days         | 356 |
| <i>gypsy/+; UAS FOXO/+</i>      | 90 days         | 351 |
| <i>Ubi/+; UAS FOXO/+</i>        | 82 days         | 336 |

383

384 **Figure 8. Increasing FOXO activity can rescue longevity effect.** a) *dFOXO* exon 8 is detected.  
 385 RT-qPCR of 5-day old males. Data are represented as means  $\pm$  SD (3 biological replicates, each dot  
 386 is a pool of 5 flies). One-tailed t test, \* p value 0.021. b) Survival curves of male flies expressing  
 387 *gypsy* and *dFOXO* under the control of *Ubiquitin* Gal4 (Red line) and the parental controls: *Ubi/+*;  
 388 UAS-*FOXO/+* (Black) and *gypsy/+*; UAS-*FOXO/+* (Blue). Data represents 2 biological replicates,  
 389 error bars SE. \* 0.018 p value, \*\*\*\* p value <0.0001, Log-rank test. c) 3' end of ectopic *gypsy*  
 390 transcript is detected. RT-qPCR of 5-day old males. Data are represented as means  $\pm$  SD (3  
 391 biological replicates, each dot is a pool of 5 flies) One tailed Mann-Whitney test, a non-parametric  
 392 test, was best suited to fit the tailed distribution of the data, \* p value 0.05.



## 393 **DISCUSSION**

394           Aging can be described as a systemic breakdown due to the accumulation of  
395 different stress conditions (López-Otín et al., 2013). The stress response transcription  
396 factor FOXO can promote longevity by helping the cell respond to a myriad of  
397 conditions: oxidative stress, heat shock, virus infection and defects in protein  
398 homeostasis to name a few (Donovan & Marr, 2016; Martins et al., 2016; Spellberg &  
399 Marr, 2015). Whether FOXO can protect from the detrimental effects of TE activity on  
400 lifespan is an open question.

401           To begin to investigate this question we measured TE expression with age in  
402 dFOXO null and isogenic wt flies. Previous studies of wt animals report both increased  
403 and decreased TE mRNA levels with age (Chen et al., 2016; LaRocca et al., 2020). In  
404 one study of the female fatbody (5d vs 50d), researchers observed significant increases  
405 in 18 TE expression and decreases of 18 TE out of the 111 detected (Chen et al.,  
406 2016). While the total number of TE with detectable mRNA changes is lower in our  
407 whole animal study, the fact that we detect both increases and decreases in the  
408 wildtype animals is consistent with the fatbody study. In the genetic background used  
409 here, we find 18 TE have increased mRNA levels in dFOXO null flies, while only two TE  
410 showed increased mRNA in wt. Surprisingly, no TE expression is significantly  
411 decreased with age in the dFOXO null flies indicating an increase TE load in aged  
412 dFOXO null animals. Further, it suggests that the FOXO null animals are deficient in  
413 mounting a response to restrict TE expression.

414           Each fly strain has a unique set of TE that are capable of being transcribed.  
415   Likely due to differences in the TE landscape such as the number and location of  
416   individual TE copies in the genome (Rahman et al., 2015). We observed this difference  
417   in expressed TEs even when comparing expression in young flies (Fig. 1e.) This agrees  
418   with previous work showing supposedly isogenic stocks of *D. melanogaster* can have  
419   very different TE landscapes (Rahman et al., 2015). This difference in TE content and  
420   expression between our wt and dFOXO null strain makes it difficult to determine the  
421   effect of FOXO on individual endogenous TEs.

422           We created the UAS-*gypsy* system to circumvent the difference in TE  
423   landscapes and simultaneously perform a direct assay to determine whether TE activity  
424   in somatic tissue can be a causative agent of mortality and aging associated  
425   phenotypes. We chose the *gypsy* TE as our model for several reasons. First, because  
426   previous work has shown that *gypsy* insertions increase during aging, so this  
427   retrotransposon is relevant in the natural condition (Y.-H. Chang et al., 2019; Li et al.,  
428   2013). Second, a full-length clone of *gypsy* is available and it has been shown to be  
429   active and capable of transposition (Bayev et al., 1984). And lastly, the presence of only  
430   one full length copy of *gypsy* in the *D. melanogaster* reference genome (Kaminker et al.,  
431   2002) suggests a low copy number and mitigates possible unintended trans effects  
432   between the endogenous and ectopic TE. To further separate our ectopic TE, a unique  
433   3' sequence tag was inserted. This allows the detection and differentiation of *gypsy*  
434   mRNA and DNA content derived from our ectopic *gypsy* element.

435           The presence of the sequence tag in the newly formed 5' LTR of new ectopic  
436 *gypsy* insertions allowed us to use our targeted sequencing approach to map a large  
437 number of individual new *gypsy* insertions derived from the UAS-*gypsy* synthetic TE.  
438 The target site duplication matched the site of endogenous *gypsy* elements (Dej et al.,  
439 1998) indicating that the UAS-*gypsy* element likely goes through a replication cycle  
440 identical to the natural *gypsy* element. The insertions seem to be evenly distributed and  
441 map largely to intronic sequences. This may reflect the fact that we can only recover  
442 insertions that do not have a dramatic effect on cell growth. Genomes that suffer  
443 insertions disrupting genes that are required for cell viability will be lost from the  
444 population and will not be recovered. This approach shows that the UAS-*gypsy* element  
445 can make an active transposon that can insert at sites across the genome with little  
446 chromosomal bias.

447           The induction of TE activity in somatic tissue resulted in a reduction in *D.*  
448 *melanogaster* lifespan when compared to parental controls and a significant increase in  
449 mortality in middle aged animals. There was a 19% decrease in the lifespan of male  
450 animals. Interestingly, the mortality effects of the active TE are only evident in relatively  
451 aged animals, despite the fact that the retrotransposon is active during early life. This  
452 suggests that the young animals can tolerate expression and insertion of the TE. It is  
453 only when the animals begin to age that TE expression becomes a burden and takes a  
454 toll. Perhaps it is the combination of the other metabolic and physiological effects of  
455 aging with the TE activity that is detrimental. Coincidentally, this is also the timeframe that  
456 endogenous TE become expressed during normal aging (Li et al., 2013; Yang et al.,  
457 2022).

458           The detectable ectopic *gypsy* insertions were quantified to determine if an  
459 increase in detected insertions in the active *gypsy* flies would correlate with the  
460 decrease in lifespan. Unexpectedly, detectable insertions do not seem to increase with  
461 age, despite constant (although much more variable) expression of the transgene as the  
462 animals age. In fact, the oldest animals have the lowest detectable insertions. This  
463 finding was measured through three different approaches (the 5' new insertion junction,  
464 the 3' fragment of ectopic *gypsy*, and the wildtype *gypsy* env gene). All three  
465 approaches agree and show a consistent decrease with age of ectopic *gypsy* DNA  
466 content. This suggests that unknown mechanisms are acting to clear or at least prevent  
467 an increase in TE insertion load. Whether it is at the level of cellular loss or DNA repair  
468 remains to be determined.

469           By using a UAS-*gypsy* strain with a defective RT we were able to determine that  
470 a functional RT is needed for the TE effect on lifespan. Previous studies have  
471 suggested the need for RT to see detrimental TE effects (Gorbunova et al., 2021). The  
472 reverse transcriptase inhibitor 3TC extends the life span of a *Dcr-2* null fly strain, which  
473 has an increase in TE expression (Wood et al., 2016). The need for a functional RT to  
474 decrease lifespan implicates the DNA synthesis step as being detrimental. Because this  
475 also prevents downstream steps such as gene disruption through integration and DNA  
476 damage from incomplete integration it is not clear what step beyond DNA synthesis is  
477 most detrimental. Future experiments using this approach with integrase mutants of  
478 *gypsy* may help to answer this question.

479           The decrease in lifespan also opened the question of whether the active *gypsy*  
480 flies were aging more rapidly, and whether accelerated aging phenotypes could be  
481 detected. Criteria to determine premature aging and distinguish it from other causes can  
482 be summarized as follows (Salk, 2013). It must first be determined that the increase of  
483 mortality at younger ages does not alter the shape of the survival curve. An altered  
484 shape of the survival curve indicates that the health of the subjects was compromised  
485 and the increase in mortality could be due to unforeseen disease or other factors apart  
486 from natural aging processes (Piper & Partridge, 2016). Secondly, a proportional  
487 progression of all aging phenotypes without induction of disease must also be observed.  
488 The shape of the survival curve for the active *gypsy* flies indicated that the flies were  
489 healthy and thus the increase in mortality was not due to disease or external factors.  
490 The health of the active *gypsy* flies in the face of their increased mortality led us to test if  
491 aging associated phenotypes might be proportionally progressing in them. To determine  
492 if this was the case, four aging phenotypes were measured to try to detect whether an  
493 acceleration in phenotype development with respect to the parental controls was  
494 occurring in the active *gypsy* flies.

495           Not all phenotypes responded the same. Two out of the four phenotypes  
496 assayed show an accelerated decay. An active *gypsy* accelerates the decrease in  
497 resistance to paraquat of aging flies. Interestingly, this finding parallels the  
498 hypersensitivity to oxidative stress observed when *Dcr-2* is mutated (Lim et al., 2011).  
499 Perhaps most dramatically, 5-day old animals with an active *gypsy* have the oxidative  
500 stress resistance of a 15-day old animal. The animals' rhythmicity is also impacted. In  
501 active *gypsy* flies, rhythmicity decays at a slightly faster rate with most animals

502 becoming only weakly rhythmic by day 30. Other measures of circadian behavior such  
503 as total activity and period did not change with an active TE. The decay of locomotor  
504 activity also occurred at a rate similar to controls indicating that not all aging phenotypes  
505 show an accelerated decay in response to an active TE. The absence of a locomotor  
506 defect also parallels what was observed in the *Dcr-2* null fly strain (Lim et al., 2011).  
507 The distinct effects an active TE can generate on the aging phenotypes examined  
508 implies that the hallmarks of aging are not uniformly affected, and different aging  
509 processes might originate or impact a unique subset of hallmarks. We find that an active  
510 TE can accelerate a subset of aging phenotypes, and provide evidence that TE are not  
511 merely bystanders in the aging process and can behave as causative agents once they  
512 are active.

513         The development and use of a controllable TE expression system with a direct  
514 detrimental effect on longevity allowed us to assay whether increasing the activity of the  
515 transcription factor dFOXO played a role in promoting longevity in the face of an active  
516 TE. We find that mild overexpression of *dFOXO* can rescue the lifespan defect in the  
517 active *gypsy* flies. Though the UAS-*gypsy* was active, the decrease in lifespan was  
518 almost completely rescued, highlighting dFOXO's ability to prolong lifespan in the face  
519 of TE activity. We and others have previously shown that FOXO responds to paraquat  
520 induced oxidative stress (Z. Chang et al., 2019; Donovan & Marr, 2016; Wang et al.,  
521 2005) and that dFOXO activates the RNAi pathway (Spellberg & Marr, 2015). Both of  
522 these responses would enhance the ability of dFOXO to combat the detrimental effect  
523 on lifespan caused by an active TE and suggests a potential new role for dFOXO in its  
524 vast repertoire to promote longevity (Martins et al., 2016).

## 525 MATERIALS AND METHODS

526

527 Fly stocks, *D. melanogaster* husbandry and constructs

528 *D. melanogaster* stocks and experimental flies were maintained at 25 °C with a 12 h

529 light/dark cycle at controlled relative humidity. Male flies were used for this study. The

530 fly strains used for RNA-seq were dFOXO null ( $w^{DAH \Delta 94}$ ) and its isogenic wildtype

531 control  $w^{DAH}$ , both have been previously described (Spellberg & Marr, 2015). The UAS-

532 *gypsy* TAG fly strain was created by modifying the plasmid pDM111, which contains an

533 active copy of *gypsy* (Bayev et al., 1984) (a generous gift from the Corces lab). The

534 white marker from pTARG (Egli et al., 2006), and a phiC31 attB site were added to the

535 plasmid and a unique sequence was inserted in the *gypsy* 3'LTR. The 5' LTR of *gypsy*

536 was precisely replaced with the UAS promoter from pUAST (Brand & Perrimon, 1993)

537 such that the start of transcription matched the start for the *gypsy* LTR. For the RT

538 deletion, the UAS-*gypsy* parent plasmid was cut with AflIII to create an in frame deletion

539 of most of the RT from the *gypsy* polyprotein (Marlor et al., 1986). The constructs were

540 sent to BestGene Inc (Chino Hills, CA) for injection into *D. melanogaster*. Transgenes

541 were integrated into the VK37 (Venken et al., 2006) attP site (BDSC 9752) using

542 PhiC31 integrase and balanced. The line was then extensively backcrossed into the

543  $w^{1118}$  background. The *Ubi-Gal4* and UAS-FOXO fly strains were obtained from

544 Bloomington (32551 and 42221, respectively) and crossed for at least 5 generations

545 into the  $w^{1118}$  lab stock. The following strains were generated by crosses:  $w^{1118};$

546 *Ubi>gypsy* ( $w^{1118};$  UAS-*gypsy* mated to  $w^{1118};$  *Ubi-Gal4*),  $w^{1118};$  *Ubi> $\Delta$ RT* ( $w^{1118};$   $\Delta$ RT

547 mated to  $w^{1118};$  *Ubi-Gal4*),  $w^{1118};$  *Ubi/+*; UAS-FOXO/+ ( $w^{1118};$  *Ubi-Gal4*; +*TM3* mated to

548  $w^{1118};$  UAS-FOXO),  $w^{1118};$  *Ubi/UAS-gypsy*; UAS-FOXO/+ and  $w^{1118};$  UAS-*gypsy*/+; UAS-

549 *FOXO/+ (w<sup>1118</sup>; Ubi/+; UAS-FOXO/+* mated to *w<sup>1118</sup>; UAS-gypsy*). All flies used  
550 throughout our experimental procedures were placed in the *w<sup>1118</sup>* genetic background.  
551  
552 RNA-seq  
553 Total RNA from the whole body of 10 male *w<sup>DAH</sup>* and dFOXO null (*w<sup>DAH Δ94</sup>*) flies was  
554 extracted with TRI Reagent at 5 to 6 days and 30 to 31 days old according to the  
555 manufacturers protocol (Molecular Research Center, Inc., Cincinnati, OH). To generate  
556 RNA-seq libraries, 1 µg of total RNA was used as input for the TruSeq RNA Library  
557 Prep Kit v2 (Illumina, Inc., San Diego, CA) and the manufacturer's protocol was  
558 followed. Libraries were sequenced on an Illumina NextSeq 500 in 1 x 75 bp mode.  
559 Three individually isolated biological replicates were sequenced for each condition.  
560  
561 Bioinformatics  
562 RNA-seq fastq files were uploaded to the public server usegalaxy.org and processed at  
563 the Galaxy web platform (Afgan et al., 2018). The tools FASTQ Groomer (Blankenberg  
564 et al., 2010) and FastQC (Andrews, 2010) were used for library quality control. To  
565 obtain gene counts, the RNA STAR aligner (Dobin et al., 2012) was used to map the  
566 sequencing data to both the *D. melanogaster* genome (dm6) and to a TE consensus  
567 FASTA file with 176 *Drosophila* TE. The R package DEBrowser (Kucukural et al., 2019)  
568 was used for the following procedures: to filter the counts (1 count per million (CPM) in  
569 at least 11/12 libraries), 105 TE passed filtering, calculate differential expression and  
570 statistical significance with DESeq2 (parameters: 5% false discovery, 1.5 fold, local, no  
571 beta prior, LRT), and generate volcano and scatter plots.



572

### 573 Life Span Assays

574 Life span assays were performed as previously described (Linford et al., 2013). Briefly,  
575 newly eclosed flies were mated for 48hr, sorted by gender, and kept at a standard  
576 density of 15 flies per vial. Flies were transferred to fresh food every 2-3 days and  
577 mortality was recorded. 3 independent biological replicates of at least 100 flies were  
578 performed at different times for *Ubi>gypsy*. The age specific mortality rate was  
579 calculated by dividing the deaths occurred in a given age group by the size of the  
580 population in which the deaths occurred (*Principles of Epidemiology | Lesson 3 -*  
581 *Section 3*, 2021). 2 independent biological replicates were performed at different times  
582 for *Ubi>gypsy*; *UAS-FOXO/+* and *Ubi> $\Delta$ RT*. Kaplan-Meier survival curves were  
583 generated with GraphPad Prism version 9 (GraphPad Software, San Diego, California  
584 USA, [www.graphpad.com](http://www.graphpad.com)) and analyzed with the Log Rank test.

585

### 586 RT-qPCR and genomic DNA qPCR

587 Total RNA or DNA was extracted from the whole body of 5-10 male flies. RNA was  
588 extracted with the TRI Reagent according to the manufacturers protocol (Molecular  
589 Research Center, Inc., Cincinnati, OH) and genomic DNA as described previously  
590 (Aljanabi & Martinez, 1997). cDNA for RT-qPCR was synthesized as previously  
591 described (Olson et al., 2013). RT-qPCR and gDNA qPCR were performed as follows:  
592 for a 10  $\mu$ L reaction 2  $\mu$ L of cDNA or 50ng of DNA were used as template and assayed  
593 with SYBR green with the primers in Table 1. For all experiments, three biological

594 replicates were assayed for each condition and the relative expression was calculated  
595 as a fraction of the housekeeping gene Rp49.

596  
597 Table 1. qPCR Primers.

| Target                 | Forward               | Reverse                |
|------------------------|-----------------------|------------------------|
| Tag- Provirus junction | GCCAAGCTCAGAATTAACCC  | TGGTGGGTTTCAGATTGTTGG  |
| <i>gypsy</i> env – Tag | TACAGCGCACCATCGATACT  | GTGAGGGTTAATTCTGAGCTTG |
| <i>gypsy</i> env       | CTCTGCTACACCGGATGAGT  | AGTATCGATGGTGCGCTGTA   |
| Rp49                   | CCACCAGTCGGATCGATATGC | CTCTTGAGAACGCAGGCGACC  |
| FOXO                   | CACGGTCAACACGAACCTGG  | GGTAGCCGTTTGTGTTGCCA   |

598  
599 Oligo adenylation

600 MB1192 was adenylated using recombinant MTH ligase (Zhelkovsky & McReynolds,  
601 2011). 200pmol of oligo was adenylated in a 200µl reaction (50mM Tris 7.5, 10mM  
602 MgCl<sub>2</sub>, 0.1mM EDTA, 0.1mM ATP, 5mM DTT) with 10µl recombinant MTH ligase. The  
603 reaction was incubated at 65°C for 1 hour and terminated by incubation at 85°C for 15  
604 minutes. 20µg of glycogen was added to the reaction followed by 500µl ethanol. The  
605 oligo was placed at -20°C for 30 minutes and collected by centrifugation. The pellet was  
606 resuspended in 100µl 6M GuHCl, 50mM Tris 6.8. 400µl of ethanol was added and the  
607 oligo was loaded onto a silica spin column (BioBasic PCR cleanup). The column was  
608 washed once with 80% ethanol and then centrifuged until dry. The adenylated oligo was  
609 eluted in 40µl TE and quantitated by UV absorbance.

610  
611 NGS library preparation

612 To prepare the insertion libraries, 250ng of genomic DNA was digested with the 4-base  
613 cutter MnlI (NEB, Ipswich, MA), overnight at 37°C according to manufacturer's  
614 recommendations, to fragment the genome. Additionally, MnlI cuts the UAS-*gypsy*

615 element 61 times including 17bp from the 5' end of the 3'LTR to limit the recovery of the  
616 parental UAS-*gypsy* sequences. The fragmented DNA was purified using a silica-based  
617 PCR cleanup kit (Biobasic, Markham, Canada). A biotinylated primer (MB2640)  
618 annealing to the TAG sequence was annealed and extended with 20 cycles of linear  
619 amplification with pfuX7(Nørholm, 2010) in a 100µl reaction (20mM Tris-HCl pH 8.8 at  
620 25°C, 10mM (NH<sub>4</sub>)<sub>2</sub>SO<sub>4</sub>, 10mM KCl, 2mM MgSO<sub>4</sub>, 0.1% Triton® X-100, 200µM  
621 dNTPs, 0.5µM primer, 5u pfuX7) The reaction was quenched by adding 400µl TENI  
622 (10mM Tris 8.0, 1mM EDTA, 25mM NaCl, 0.01% Igepal 630). Biotinylated products  
623 were purified using M270 dynabeads (ThermoFisher, Waltham, MA) by incubating the  
624 reaction for 30 minutes at room temperature followed by magnetic separation of bound  
625 DNA. The beads were washed three times with TENI. Single-stranded biotinylated DNA  
626 was purified by incubating the beads with 0.15N NaOH for 15 minutes at room  
627 temperature. Beads were washed once more with 0.15N NaOH to remove the non-  
628 biotinylated DNA strand. Beads were neutralized by washing two times in TENI and  
629 transferred to a new tube. The adenylated MB1192 oligo was ligated to the biotinylated  
630 ssDNA on the dynabeads using MTH ligase(Torchia et al., 2008). Beads were  
631 resuspended in a 60µl reaction containing 10mM Hepes pH7.4, 5mM MnCl<sub>2</sub> and  
632 60pmol adenylated MB1192 oligo. 5µl recombinant MTH RNA ligase was added and the  
633 reaction was incubated at 65°C for 1 hour and terminated by incubation at 85°C for 15  
634 minutes. The library was amplified by PCR using a primer to the ligated product  
635 (MB1019) and a nested primer containing a 5' tail with illumina sequences (MB2669).  
636 The individual libraries were amplified by PCR using primers containing attachment

637 sequences (MB583) and barcodes (MB26673 or MB2674 or MB2675). Libraries were  
638 sequenced on an illumina Miseq using a PE 150 kit.

639

640 Table 2. Primers for NGS sequencing.

|        |                                                                         |
|--------|-------------------------------------------------------------------------|
| MB2640 | Biotin-GTGAGGGTTAATTCTGAGCTTGGC                                         |
| MB1192 | Phos-AGATCGGAAGAGCACACGTCTGA-3' amino blocked                           |
| MB1019 | TCAGACGTGTGCTCTTCCGATCT                                                 |
| MB2669 | CCTACACGACGCTCTTCCGATCTNNNTTCTTCGCGTGGAGCGTTGA                          |
| MB583  | AATGATACGGCGACCACCGAGATCTACACTCTTTCCCTACACGACGC<br>TCTTCCGATCT          |
| MB2673 | CAAGCAGAAGACGGCATAACGAGATTCCGAAACGTGACTGGAGTTCAG<br>ACGTGTGCTCTTCCGATCT |
| MB2674 | CAAGCAGAAGACGGCATAACGAGATTACGTACGGTGACTGGAGTTCAG<br>ACGTGTGCTCTTCCGATCT |
| MB2675 | CAAGCAGAAGACGGCATAACGAGATATCCACTCGTGACTGGAGTTCAG<br>ACGTGTGCTCTTCCGATCT |

641

642 Insertion mapping

643 To process the reads, the fastQ file was first separated by illumina barcode. The

644 individual libraries were processed using Galaxy (Afgan et al., 2018). First MB2667

645 primer sequences were removed from read 1 using Trimmomatic (Bolger et al., 2014).

646 Reads containing the *gypsy* LTR were separated using Barcode Splitter. The remaining

647 LTR sequences were removed using cutadapt (Martin, 2011). The reads were filtered

648 for size and then aligned to the UAS-*gypsy* construct. 20-35% of the reads mapped to

649 the original parental UAS-*gypsy*. Unaligned reads were then aligned to the *Drosophila*

650 genome (dm6) using Bowtie2 (Langmead & Salzberg, 2012). PCR duplicates were

651 removed, and the insertion sites were compared to the flybase genespan annotation to

652 identify all insertions in transcribed regions. Insertion sites were compared to the intron

653 annotation for Ensembl for identifying insertions in introns. The reverse complement of

654 the first 22 nucleotides of the deduplicated insertion sites were used to determine the

655 probability of finding each nucleotide at each position using weblogo3 (Crooks et al.,  
656 2004).

657

658 Paraquat stress assay

659 Male flies generated and reared in the same conditions as life span assay flies were fed  
660 20mM paraquat at 5, 15, 30, or 50 days. Briefly, at the specified time point flies were  
661 starved for 3-4 hr prior to transfer into a minimal food medium (5% sucrose, 2% agar,  
662 water) containing 20mM paraquat. Mortality was recorded in 8 and 16 hr intervals. 95-  
663 100 flies were used per genotype/timepoint for all time points except 5 day Ubi/+ which  
664 had 90 flies. Kaplan-Meier survival curves were generated with GraphPad Prism version  
665 9 (GraphPad Software, San Diego, California USA) and analyzed with the Log Rank  
666 test.

667

668 Negative Geotaxis Assay

669 A negative geotaxis assay based on previously established protocols (Gargano et al.,  
670 2005; Madabattula et al., 2015; Tuxworth et al., 2019) was set up to assay experimental  
671 and control flies at 7, 14, 35, and 56 days. Briefly, male flies generated and reared in life  
672 span assay conditions were used. The same cohort was assayed for all the different time  
673 points. The day before the experiment, flies were transferred under light CO<sub>2</sub> to fresh  
674 food vials (10 flies per vial) and allowed to recover for at least 18 hr. Flies were then taken  
675 out of the incubator and allowed to acclimate to room temperature for 1 hr. They were  
676 then transferred to a 50 mL graduated glass cylinder (VWR, Radnor, PA) sealed with a  
677 cotton plug and allowed to acclimate for 1 min before starting trials. Trials were recorded

678 on an iPhone X camera (Apple Inc, Cupertino, California) placed 30 cm away from the  
679 recording spot. A trial consisted in tapping flies to the base of the cylinder and allowing  
680 them to climb for 20 seconds. They were then given 60 seconds to recover before starting  
681 the next trial. A total of 5 trials was performed for each vial. 10 vials were assayed per  
682 genotype. N = 100. Flies were then transferred to fresh food vials and returned to the  
683 incubator. Linear regression was performed in Prism (GraphPad Software, San Diego,  
684 California USA, [www.graphpad.com](http://www.graphpad.com)) to determine the slope of the curves and any  
685 possible significant differences.

686

#### 687 Locomotor Activity Analysis

688 Flies were entrained in 12:12 LD (light-dark) conditions at 25 °C. The locomotor activity  
689 of 20, 30, and 40 days old male flies was recorded using the Trikinetics locomotor activity  
690 monitor (Waltham, MA). Two sets of experiments were conducted. On one set, flies were  
691 maintained in 12:12 LD throughout the whole length of the experiment (10-12 days). The  
692 other set, was entrained in 12:12 for 3 days, followed by at least 5 days in constant  
693 darkness (DD). Quantification of total activity and the analysis of circadian rhythmicity  
694 strength and period were conducted in Matlab using Vecsey's SCAMP (Donelson et al.,  
695 2012). Flies with a rhythmicity index (RI) < 0.1 were classified as arrhythmic; ones with  
696 RI 0.1-0.2, as weakly rhythmic, while flies with RI >0.2 were considered strongly rhythmic.  
697 Only the period of weakly or strongly rhythmic flies were included in the calculation of the  
698 free-running period for each genotype. N is included in figure.

699

#### 700 Statistics

701 All statistical analyses, except RNA-seq, were conducted using GraphPad Prism  
702 version 9 for Mac (GraphPad Software, San Diego, California USA,  
703 [www.graphpad.com](http://www.graphpad.com)). Multiple comparisons in the Ordinary one-way and 2way ANOVA  
704 were corrected by the two-stage linear step-up procedure of Benjamini, Krieger and  
705 Yekutieli with a false discovery rate of 5%.

706

707 Materials availability statement

708 The transgenic fly strains created during this study can be obtained by request to the  
709 corresponding author. All next generation sequencing data generated are undergoing  
710 submission at the GEO database and will be publicly accessible.

711 **REFERENCES**

- 712
- 713 Afgan, E., Baker, D., Batut, B., van den Beek, M., Bouvier, D., Čech, M., Chilton, J., Clements, D.,  
714 Coraor, N., Grüning, B. A., Guerler, A., Hillman-Jackson, J., Hiltmann, S., Jalili, V.,  
715 Rasche, H., Soranzo, N., Goecks, J., Taylor, J., Nekrutenko, A., & Blankenberg, D. (2018).  
716 The Galaxy platform for accessible, reproducible and collaborative biomedical analyses:  
717 2018 update. *Nucleic Acids Research*, *46*(W1), W537–W544.  
718 <https://doi.org/10.1093/nar/gky379>
- 719 Aljanabi, S. M., & Martinez, I. (1997). Universal and rapid salt-extraction of high quality genomic  
720 DNA for PCR-based techniques. *Nucleic Acids Research*, *25*(22), 4692–4693.  
721 <https://doi.org/10.1093/nar/25.22.4692>
- 722 Andrews, S. (2010). *FastQC A Quality Control tool for High Throughput Sequence Data*.  
723 <https://www.bioinformatics.babraham.ac.uk/projects/fastqc/>
- 724 Arking, R., Buck, S., Berrios, A., Dwyer, S., & Baker, G. T. (1991). Elevated paraquat resistance  
725 can be used as a bioassay for longevity in a genetically based long-lived strain of  
726 *Drosophila*. *Developmental Genetics*, *12*(5), 362–370.  
727 <https://doi.org/10.1002/dvg.1020120505>
- 728 Bayev, A. A., Lyubomirskaya, N. V., Dzhumagaliev, E. B., Ananiev, E. V., Amiantova, I. G., & Ilyin,  
729 Y. V. (1984). Structural organization of transposable element mdg4 from *Drosophila*  
730 *melanogaster* and a nucleotide sequence of its long terminal repeats. *Nucleic Acids*  
731 *Research*, *12*(8), 3707–3723.
- 732 Blankenberg, D., Gordon, A., Von Kuster, G., Coraor, N., Taylor, J., & Nekrutenko, A. (2010).  
733 Manipulation of FASTQ data with Galaxy. *Bioinformatics*, *26*(14), 1783–1785.
- 734 Bolger, A. M., Lohse, M., & Usadel, B. (2014). Trimmomatic: A flexible trimmer for Illumina  
735 sequence data. *Bioinformatics (Oxford, England)*, *30*(15), 2114–2120.  
736 <https://doi.org/10.1093/bioinformatics/btu170>
- 737 Brand, A. H., & Perrimon, N. (1993). Targeted gene expression as a means of altering cell fates  
738 and generating dominant phenotypes. *Development (Cambridge, England)*, *118*(2), 401–  
739 415.



- 740 Calnan, D. R., & Brunet, A. (2008). The FoxO code. *Oncogene*, 27(16), 2276–2288.  
741 <https://doi.org/10.1038/onc.2008.21>
- 742 Cecco, M. D., Ito, T., Petrashen, A. P., Elias, A. E., Skvir, N. J., Criscione, S. W., Caligiana, A.,  
743 Broccoli, G., Adney, E. M., Boeke, J. D., Le, O., Beauséjour, C., Ambati, J., Ambati, K.,  
744 Simon, M., Seluanov, A., Gorbunova, V., Slagboom, P. E., Helfand, S. L., ... Sedivy, J. M.  
745 (2019). L1 drives IFN in senescent cells and promotes age-associated inflammation.  
746 *Nature*, 566(7742), 73–78. <https://doi.org/10.1038/s41586-018-0784-9>
- 747 Chang, Y.-H., Keegan, R. M., Prazak, L., & Dubnau, J. (2019). Cellular labeling of endogenous  
748 retrovirus replication (CLEVR) reveals de novo insertions of the gypsy retrotransposable  
749 element in cell culture and in both neurons and glial cells of aging fruit flies. *PLOS*  
750 *Biology*, 17(5), e3000278. <https://doi.org/10.1371/journal.pbio.3000278>
- 751 Chang, Z., Xia, J., Wu, H., Peng, W., Jiang, F., Li, J., Liang, C., Zhao, H., Park, K., Song, G., Kim, S.,  
752 Huang, R., Zheng, L., Cai, D., & Qi, X. (2019). Forkhead box O3 protects the heart against  
753 paraquat-induced aging-associated phenotypes by upregulating the expression of  
754 antioxidant enzymes. *Aging Cell*, 18(5), e12990. <https://doi.org/10.1111/accel.12990>
- 755 Chen, H., Zheng, X., Xiao, D., & Zheng, Y. (2016). Age-associated de-repression of  
756 retrotransposons in the Drosophila fat body, its potential cause and consequence. *Aging*  
757 *Cell*, 15(3), 542–552. <https://doi.org/10.1111/accel.12465>
- 758 Chung, W.-J., Okamura, K., Martin, R., & Lai, E. C. (2008). Endogenous RNA Interference  
759 Provides a Somatic Defense against Drosophila Transposons. *Current Biology : CB*,  
760 18(11), 795–802. <https://doi.org/10.1016/j.cub.2008.05.006>
- 761 Crooks, G. E., Hon, G., Chandonia, J.-M., & Brenner, S. E. (2004). WebLogo: A sequence logo  
762 generator. *Genome Research*, 14(6), 1188–1190. <https://doi.org/10.1101/gr.849004>
- 763 Curran, J. A., Buhl, E., Tsaneva-Atanasova, K., & Hodge, J. J. L. (2019). Age-dependent changes in  
764 clock neuron structural plasticity and excitability are associated with a decrease in  
765 circadian output behavior and sleep. *Neurobiology of Aging*, 77, 158–168.  
766 <https://doi.org/10.1016/j.neurobiolaging.2019.01.025>
- 767 Czech, B., Malone, C. D., Zhou, R., Stark, A., Schlingehayde, C., Dus, M., Perrimon, N., Kellis, M.,  
768 Wohlschlegel, J. A., Sachidanandam, R., Hannon, G. J., & Brennecke, J. (2008). An

- 769 endogenous small interfering RNA pathway in *Drosophila*. *Nature*, 453(7196), 798–802.  
770 <https://doi.org/10.1038/nature07007>
- 771 De Cecco, M., Criscione, S. W., Peckham, E. J., Hillenmeyer, S., Hamm, E. A., Manivannan, J.,  
772 Peterson, A. L., Kreiling, J. A., Neretti, N., & Sedivy, J. M. (2013). Genomes of  
773 replicatively senescent cells undergo global epigenetic changes leading to gene silencing  
774 and activation of transposable elements. *Aging Cell*, 12(2), 247–256.  
775 <https://doi.org/10.1111/accel.12047>
- 776 De Cecco, M., Criscione, S. W., Peterson, A. L., Neretti, N., Sedivy, J. M., & Kreiling, J. A. (2013).  
777 Transposable elements become active and mobile in the genomes of aging mammalian  
778 somatic tissues. *Aging*, 5(12), 867–883. <https://doi.org/10.18632/aging.100621>
- 779 Dej, K. J., Gerasimova, T., Corces, V. G., & Boeke, J. D. (1998). A hotspot for the *Drosophila*  
780 gypsy retroelement in the *ovo* locus. *Nucleic Acids Research*, 26(17), 4019–4025.
- 781 Dobin, A., Davis, C. A., Schlesinger, F., Drenkow, J., Zaleski, C., Jha, S., Batut, P., Chaisson, M., &  
782 Gingeras, T. R. (2012). STAR: ultrafast universal RNA-seq aligner. *Bioinformatics*, 29(1),  
783 15^ a21.
- 784 Donelson, N., Kim, E. Z., Slawson, J. B., Vecsey, C. G., Huber, R., & Griffith, L. C. (2012). High-  
785 Resolution Positional Tracking for Long-Term Analysis of *Drosophila* Sleep and  
786 Locomotion Using the “Tracker” Program. *PLOS ONE*, 7(5), e37250.  
787 <https://doi.org/10.1371/journal.pone.0037250>
- 788 Donovan, M. R., & Marr, M. T. (2016). DFOXO Activates Large and Small Heat Shock Protein  
789 Genes in Response to Oxidative Stress to Maintain Proteostasis in *Drosophila*. *The*  
790 *Journal of Biological Chemistry*, 291(36), 19042–19050.  
791 <https://doi.org/10.1074/jbc.M116.723049>
- 792 Egly, D., Yepiskoposyan, H., Selvaraj, A., Balamurugan, K., Rajaram, R., Simons, A., Multhaup, G.,  
793 Mettler, S., Vardanyan, A., Georgiev, O., & Schaffner, W. (2006). A family knockout of all  
794 four *Drosophila* metallothioneins reveals a central role in copper homeostasis and  
795 detoxification. *Molecular and Cellular Biology*, 26(6), 2286–2296.  
796 <https://doi.org/10.1128/MCB.26.6.2286-2296.2006>

- 797 Elsner, D., Meusemann, K., & Korb, J. (2018). Longevity and transposon defense, the case of  
798 termite reproductives. *Proceedings of the National Academy of Sciences*, *115*(21), 5504–  
799 5509. <https://doi.org/10.1073/pnas.1804046115>
- 800 García Guerreiro, M. P. (2012). What makes transposable elements move in the *Drosophila*  
801 genome? *Heredity*, *108*(5), 461–468. <https://doi.org/10.1038/hdy.2011.89>
- 802 Gargano, J. W., Martin, I., Bhandari, P., & Grotewiel, M. S. (2005). Rapid iterative negative  
803 geotaxis (RING): A new method for assessing age-related locomotor decline in  
804 *Drosophila*. *Experimental Gerontology*, *40*(5), 386–395.  
805 <https://doi.org/10.1016/j.exger.2005.02.005>
- 806 Ghildiyal, M., Seitz, H., Horwich, M. D., Li, C., Du, T., Lee, S., Xu, J., Kittler, E. L. W., Zapp, M. L.,  
807 Weng, Z., & Zamore, P. D. (2008). Endogenous siRNAs derived from transposons and  
808 mRNAs in *Drosophila* somatic cells. *Science (New York, N.Y.)*, *320*(5879), 1077–1081.  
809 <https://doi.org/10.1126/science.1157396>
- 810 Giordani, G., Cavaliere, V., Gargiulo, G., Lattanzi, G., & Andrenacci, D. (2021). Retrotransposons  
811 Down- and Up-Regulation in Aging Somatic Tissues. *Cells*, *11*(1), 79.  
812 <https://doi.org/10.3390/cells11010079>
- 813 Gorbunova, V., Seluanov, A., Mita, P., McKerrow, W., Fenyö, D., Boeke, J. D., Linker, S. B., Gage,  
814 F. H., Kreiling, J. A., Petrashen, A. P., Woodham, T. A., Taylor, J. R., Helfand, S. L., &  
815 Sedivy, J. M. (2021). The role of retrotransposable elements in ageing and age-  
816 associated diseases. *Nature*, *596*(7870), 43–53. [https://doi.org/10.1038/s41586-021-](https://doi.org/10.1038/s41586-021-03542-y)  
817 [03542-y](https://doi.org/10.1038/s41586-021-03542-y)
- 818 Hancks, D. C., Kazazian, H. H., & Jr. (2012). Active human retrotransposons: Variation and  
819 disease. *Current Opinion in Genetics & Development*, *22*(3), 191–203.  
820 <https://doi.org/10.1016/j.gde.2012.02.006>
- 821 Huang, C. R. L., Burns, K. H., & Boeke, J. D. (2012). Active transposition in genomes. *Annual*  
822 *Review of Genetics*, *46*, 651–675. [https://doi.org/10.1146/annurev-genet-110711-](https://doi.org/10.1146/annurev-genet-110711-155616)  
823 [155616](https://doi.org/10.1146/annurev-genet-110711-155616)
- 824 Hyun, S. (2017). Small RNA Pathways That Protect the Somatic Genome. *International Journal of*  
825 *Molecular Sciences*, *18*(5). <https://doi.org/10.3390/ijms18050912>

- 826 Ivics, Z., & Izsvák, Z. (2010). Repetitive elements and genome instability. *Seminars in Cancer*  
827 *Biology*, 20(4), 197–199. <https://doi.org/10.1016/j.semcan.2010.08.002>
- 828 Jiang, N., Du, G., Tobias, E., Wood, J. G., Whitaker, R., Neretti, N., & Helfand, S. L. (2013). Dietary  
829 and genetic effects on age-related loss of gene silencing reveal epigenetic plasticity of  
830 chromatin repression during aging. *Aging*, 5(11), 813–824.  
831 <https://doi.org/10.18632/aging.100614>
- 832 Kaminker, J. S., Bergman, C. M., Kronmiller, B., Carlson, J., Svirskas, R., Patel, S., Frise, E.,  
833 Wheeler, D. A., Lewis, S. E., Rubin, G. M., Ashburner, M., & Celniker, S. E. (2002). The  
834 transposable elements of the *Drosophila melanogaster* euchromatin: A genomics  
835 perspective. *Genome Biology*, 3(12), research0084.1. [https://doi.org/10.1186/gb-2002-](https://doi.org/10.1186/gb-2002-3-12-research0084)  
836 [3-12-research0084](https://doi.org/10.1186/gb-2002-3-12-research0084)
- 837 Kawamura, Y., Saito, K., Kin, T., Ono, Y., Asai, K., Sunohara, T., Okada, T. N., Siomi, M. C., &  
838 Siomi, H. (2008). *Drosophila* endogenous small RNAs bind to Argonaute 2 in somatic  
839 cells. *Nature*, 453(7196), 793–797. <https://doi.org/10.1038/nature06938>
- 840 Kucukural, A., Yukselen, O., Ozata, D. M., Moore, M. J., & Garber, M. (2019). DEBrowser:  
841 Interactive differential expression analysis and visualization tool for count data. *BMC*  
842 *Genomics*, 20(1), 6. <https://doi.org/10.1186/s12864-018-5362-x>
- 843 Langmead, B., & Salzberg, S. L. (2012). Fast gapped-read alignment with Bowtie 2. *Nature*  
844 *Methods*, 9(4), 357–359. <https://doi.org/10.1038/nmeth.1923>
- 845 LaRocca, T. J., Cavalier, A. N., & Wahl, D. (2020). Repetitive elements as a transcriptomic marker  
846 of aging: Evidence in multiple datasets and models. *Aging Cell*, 19(7), e13167.  
847 <https://doi.org/10.1111/accel.13167>
- 848 Lee, Y. S., Nakahara, K., Pham, J. W., Kim, K., He, Z., Sontheimer, E. J., & Carthew, R. W. (2004).  
849 Distinct Roles for *Drosophila* Dicer-1 and Dicer-2 in the siRNA/miRNA Silencing  
850 Pathways. *Cell*, 117(1), 69–81. [https://doi.org/10.1016/S0092-8674\(04\)00261-2](https://doi.org/10.1016/S0092-8674(04)00261-2)
- 851 Li, W., Prazak, L., Chatterjee, N., Grüniger, S., Krug, L., Theodorou, D., & Dubnau, J. (2013).  
852 Activation of transposable elements during aging and neuronal decline in *Drosophila*.  
853 *Nature Neuroscience*, 16(5), 529–531. <https://doi.org/10.1038/nn.3368>

- 854 Lim, D.-H., Oh, C.-T., Lee, L., Hong, J.-S., Noh, S.-H., Hwang, S., Kim, S., Han, S.-J., & Lee, Y. S.  
855 (2011). The endogenous siRNA pathway in *Drosophila* impacts stress resistance and  
856 lifespan by regulating metabolic homeostasis. *FEBS Letters*, *585*(19), 3079–3085.  
857 <https://doi.org/10.1016/j.febslet.2011.08.034>
- 858 Linford, N. J., Bilgir, C., Ro, J., & Pletcher, S. D. (2013). Measurement of Lifespan in *Drosophila*  
859 *melanogaster*. *Journal of Visualized Experiments : JoVE*, *71*.  
860 <https://doi.org/10.3791/50068>
- 861 López-Otín, C., Blasco, M. A., Partridge, L., Serrano, M., & Kroemer, G. (2013). The Hallmarks of  
862 Aging. *Cell*, *153*(6), 1194–1217. <https://doi.org/10.1016/j.cell.2013.05.039>
- 863 Madabattula, S. T., Strautman, J. C., Bysice, A. M., O’Sullivan, J. A., Androschuk, A., Rosenfelt, C.,  
864 Doucet, K., Rouleau, G., & Bolduc, F. (2015). Quantitative Analysis of Climbing Defects in  
865 a *Drosophila* Model of Neurodegenerative Disorders. *Journal of Visualized Experiments :*  
866 *JoVE*, *100*, 52741. <https://doi.org/10.3791/52741>
- 867 Marlor, R. L., Parkhurst, S. M., & Corces, V. G. (1986). The *Drosophila melanogaster* gypsy  
868 transposable element encodes putative gene products homologous to retroviral  
869 proteins. *Molecular and Cellular Biology*, *6*(4), 1129–1134.  
870 <https://doi.org/10.1128/mcb.6.4.1129-1134.1986>
- 871 Martin, M. (2011). Cutadapt removes adapter sequences from high-throughput sequencing  
872 reads. *EMBnet.Journal*, *17*(1), 10–12. <https://doi.org/10.14806/ej.17.1.200>
- 873 Martins, R., Lithgow, G. J., & Link, W. (2016). Long live FOXO: unraveling the role of FOXO  
874 proteins in aging and longevity. *Aging Cell*, *15*(2), 196–207.  
875 <https://doi.org/10.1111/accel.12427>
- 876 McCLINTOCK, B. (1950). The origin and behavior of mutable loci in maize. *Proceedings of the*  
877 *National Academy of Sciences of the United States of America*, *36*(6), 344–355.
- 878 McCullers, T. J., & Steiniger, M. (2017). Transposable elements in *Drosophila*. *Mobile Genetic*  
879 *Elements*, *7*(3), 1–18. <https://doi.org/10.1080/2159256X.2017.1318201>
- 880 Morley, A. A. (1995). The somatic mutation theory of ageing. *Mutation Research/DNAging*,  
881 *338*(1), 19–23. [https://doi.org/10.1016/0921-8734\(95\)00007-5](https://doi.org/10.1016/0921-8734(95)00007-5)

- 882 Mumford, P. W., Romero, M. A., Osburn, S. C., Roberson, P. A., Vann, C. G., Mobley, C. B.,  
883 Brown, M. D., Kavazis, A. N., Young, K. C., & Roberts, M. D. (2019). Skeletal muscle LINE-  
884 1 retrotransposon activity is upregulated in older versus younger rats. *American Journal*  
885 *of Physiology. Regulatory, Integrative and Comparative Physiology*, 317(3), R397–R406.  
886 <https://doi.org/10.1152/ajpregu.00110.2019>
- 887 Nørholm, M. H. (2010). A mutant Pfu DNA polymerase designed for advanced uracil-excision  
888 DNA engineering. *BMC Biotechnology*, 10, 21. <https://doi.org/10.1186/1472-6750-10-21>
- 889 Okamura, K., Ishizuka, A., Siomi, H., & Siomi, M. C. (2004). Distinct roles for Argonaute proteins  
890 in small RNA-directed RNA cleavage pathways. *Genes & Development*, 18(14), 1655–  
891 1666. <https://doi.org/10.1101/gad.1210204>
- 892 Olson, C. M., Donovan, M. R., Spellberg, M. J., & Marr, M. T., II. (2013). The insulin receptor  
893 cellular IRES confers resistance to eIF4A inhibition. *ELife*, 2, e00542.  
894 <https://doi.org/10.7554/eLife.00542>
- 895 Piper, M. D. W., & Partridge, L. (2016). Protocols to Study Aging in Drosophila. *Methods in*  
896 *Molecular Biology (Clifton, N.j.)*, 1478, 291–302. [https://doi.org/10.1007/978-1-4939-](https://doi.org/10.1007/978-1-4939-6371-3_18)  
897 [6371-3\\_18](https://doi.org/10.1007/978-1-4939-6371-3_18)
- 898 *Principles of Epidemiology | Lesson 3—Section 3.* (2021, December 20).  
899 <https://www.cdc.gov/csels/dsepd/ss1978/lesson3/section3.html>
- 900 Rahman, R., Chirn, G. W., Kanodia, A., Sytnikova, Y. A., Brembs, B., Bergman, C. M., & Lau, N. C.  
901 (2015). Unique transposon landscapes are pervasive across Drosophila melanogaster  
902 genomes. *Nucleic Acids Research*, 43(22), 10655–10672.  
903 <https://doi.org/10.1093/nar/gkv1193>
- 904 Rakshit, K., Krishnan, N., Guzik, E. M., Pyza, E., & Giebultowicz, J. M. (2012). Effects of Aging on  
905 the Molecular Circadian Oscillations in Drosophila. *Chronobiology International*, 29(1),  
906 5–14. <https://doi.org/10.3109/07420528.2011.635237>
- 907 Rhodenizer, D., Martin, I., Bhandari, P., Pletcher, S. D., & Grotewiel, M. (2008). Genetic and  
908 environmental factors impact age-related impairment of negative geotaxis in Drosophila  
909 by altering age-dependent climbing speed. *Experimental Gerontology*, 43(8), 739–748.  
910 <https://doi.org/10.1016/j.exger.2008.04.011>

- 911 Salk, D. (2013). *Werner's Syndrome and Human Aging*. Springer Science & Business Media.
- 912 Slack, C., Giannakou, M. E., Foley, A., Goss, M., & Partridge, L. (2011). DFOXO-independent  
913 effects of reduced insulin-like signaling in *Drosophila*. *Aging Cell*, *10*(5), 735–748.  
914 <https://doi.org/10.1111/j.1474-9726.2011.00707.x>
- 915 Spellberg, M. J., & Marr, M. T. (2015). FOXO regulates RNA interference in *Drosophila* and  
916 protects from RNA virus infection. *Proceedings of the National Academy of Sciences of*  
917 *the United States of America*, *112*(47), 14587–14592.  
918 <https://doi.org/10.1073/pnas.1517124112>
- 919 Sun, Y., Yolitz, J., Wang, C., Spangler, E., Zhan, M., & Zou, S. (2013). Aging Studies in *Drosophila*  
920 *melanogaster*. *Methods in Molecular Biology (Clifton, N.J.)*, *1048*, 77–93.  
921 [https://doi.org/10.1007/978-1-62703-556-9\\_7](https://doi.org/10.1007/978-1-62703-556-9_7)
- 922 Torchia, C., Takagi, Y., & Ho, C. K. (2008). Archaeal RNA ligase is a homodimeric protein that  
923 catalyzes intramolecular ligation of single-stranded RNA and DNA. *Nucleic Acids*  
924 *Research*, *36*(19), 6218–6227. <https://doi.org/10.1093/nar/gkn602>
- 925 Treiber, C. D., & Waddell, S. (2017). Resolving the prevalence of somatic transposition in  
926 *Drosophila*. *ELife*, *6*, e28297. <https://doi.org/10.7554/eLife.28297>
- 927 Tuxworth, R. I., Taylor, M. J., Martin Anduaga, A., Hussien-Ali, A., Chatzimatthaiou, S., Longland,  
928 J., Thompson, A. M., Almutiri, S., Alifragis, P., Kyriacou, C. P., Kysela, B., & Ahmed, Z.  
929 (2019). Attenuating the DNA damage response to double-strand breaks restores  
930 function in models of CNS neurodegeneration. *Brain Communications*, *1*(1).  
931 <https://doi.org/10.1093/braincomms/fcz005>
- 932 Venken, K. J. T., He, Y., Hoskins, R. A., & Bellen, H. J. (2006). P[acman]: A BAC transgenic  
933 platform for targeted insertion of large DNA fragments in *D. melanogaster*. *Science (New*  
934 *York, N.Y.)*, *314*(5806), 1747–1751. <https://doi.org/10.1126/science.1134426>
- 935 Wang, M. C., Bohmann, D., & Jasper, H. (2005). JNK Extends Life Span and Limits Growth by  
936 Antagonizing Cellular and Organism-Wide Responses to Insulin Signaling. *Cell*, *121*(1),  
937 115–125. <https://doi.org/10.1016/j.cell.2005.02.030>
- 938 Weaver. (2008). *Molecular Biology 4th edition by Weaver, Robert F. (2008) Paperback (4th*  
939 *edition)*. McGraw Hill Higher Education.

- 940 Wood, J. G., & Helfand, S. L. (2013). Chromatin structure and transposable elements in  
941 organismal aging. *Frontiers in Genetics*, 4, 274.  
942 <https://doi.org/10.3389/fgene.2013.00274>
- 943 Wood, J. G., Jones, B. C., Jiang, N., Chang, C., Hosier, S., Wickremesinghe, P., Garcia, M.,  
944 Hartnett, D. A., Burhenn, L., Neretti, N., & Helfand, S. L. (2016). Chromatin-modifying  
945 genetic interventions suppress age-associated transposable element activation and  
946 extend life span in *Drosophila*. *Proceedings of the National Academy of Sciences of the*  
947 *United States of America*, 113(40), 11277–11282.  
948 <https://doi.org/10.1073/pnas.1604621113>
- 949 Woodruff, R. C., & Nikitin, A. G. (1995). P DNA element movement in somatic cells reduces  
950 lifespan in *Drosophila melanogaster*: Evidence in support of the somatic mutation  
951 theory of aging. *Mutation Research/DNAging*, 338(1), 35–42.  
952 [https://doi.org/10.1016/0921-8734\(95\)00009-U](https://doi.org/10.1016/0921-8734(95)00009-U)
- 953 Yang, N., Srivastav, S. P., Rahman, R., Ma, Q., Dayama, G., Li, S., Chinen, M., Lei, E. P., Rosbash,  
954 M., & Lau, N. C. (2022). Transposable element landscapes in aging *Drosophila*. *PLOS*  
955 *Genetics*, 18(3), e1010024. <https://doi.org/10.1371/journal.pgen.1010024>
- 956 Zhelkovsky, A. M., & McReynolds, L. A. (2011). Simple and efficient synthesis of 5' pre-  
957 adenylated DNA using thermostable RNA ligase. *Nucleic Acids Research*, 39(17), e117.  
958 <https://doi.org/10.1093/nar/gkr544>
- 959



960 **SUPPLEMENTS**

961 **Figure 1 Supplemental 1. Differentially expressed TE in wild type**

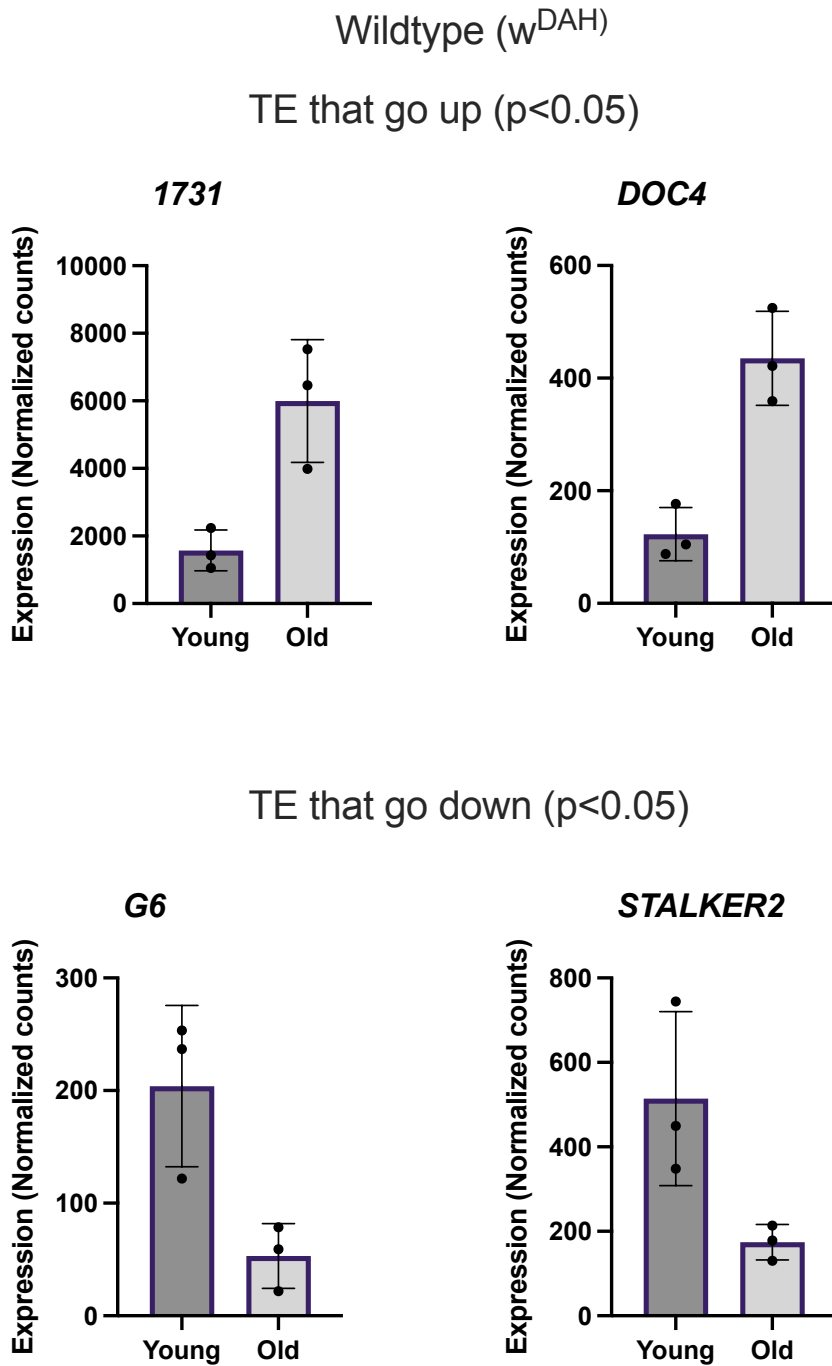

962

963 **Figure 1-S1. Differentially expressed TE in wild type.** Median ratio normalized counts by DEseq2  
964 of TE differentially expressed with age in wt flies.

965 **Figure 1 Supplemental 2. Differentially expressed TE in FOXO deletion flies.**

**FOXO deletion ( $\Delta 94$ )**

**TE that go up ( $p < 0.05$ )**

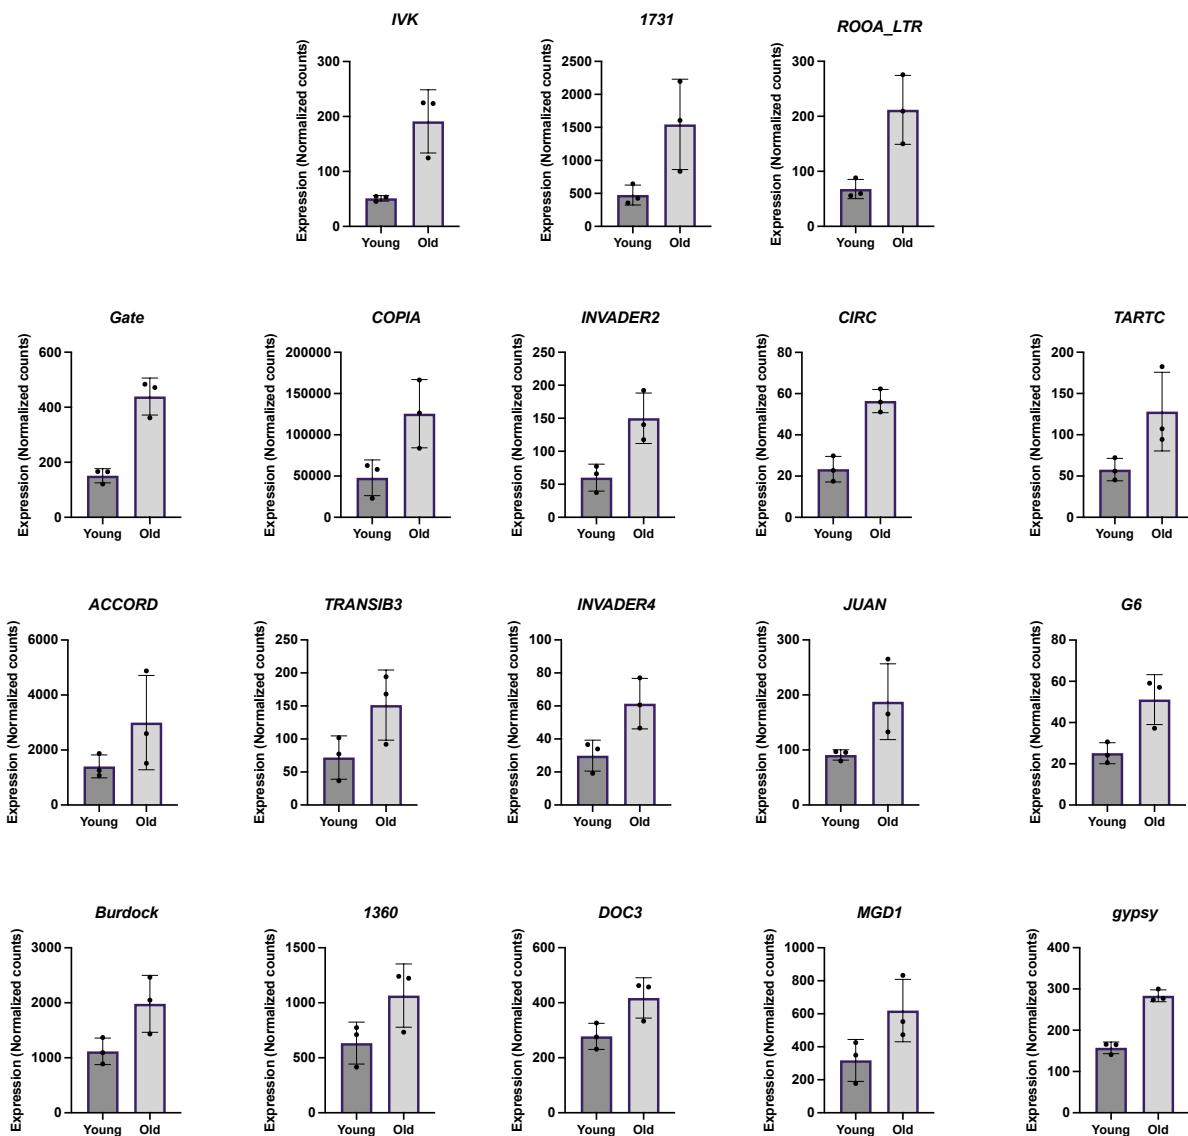

966

967 **Figure 1-S2. Differentially expressed TE in FOXO deletion flies.** Median ratio normalized counts  
 968 by DEseq2 of TE differentially expressed with age in FOXO deletion flies.

969 **Figure 3 – Supplemental 1. NGS mapping of ectopic *gypsy* insertions.**

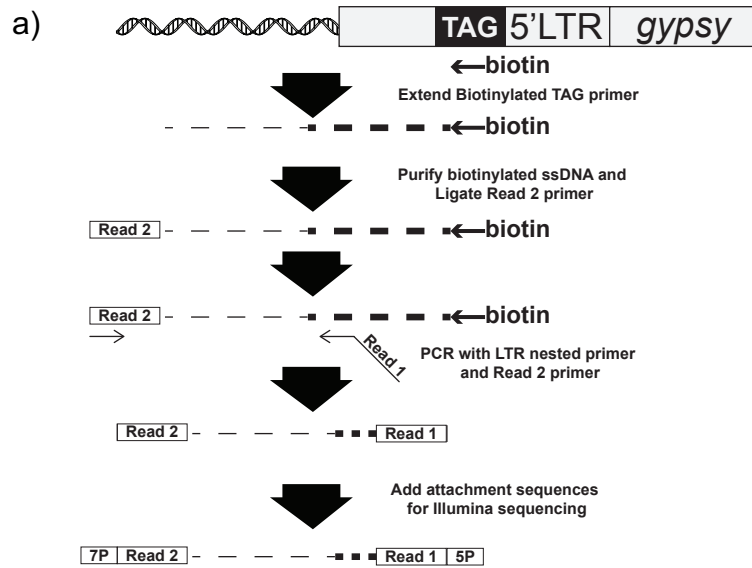

970

b)

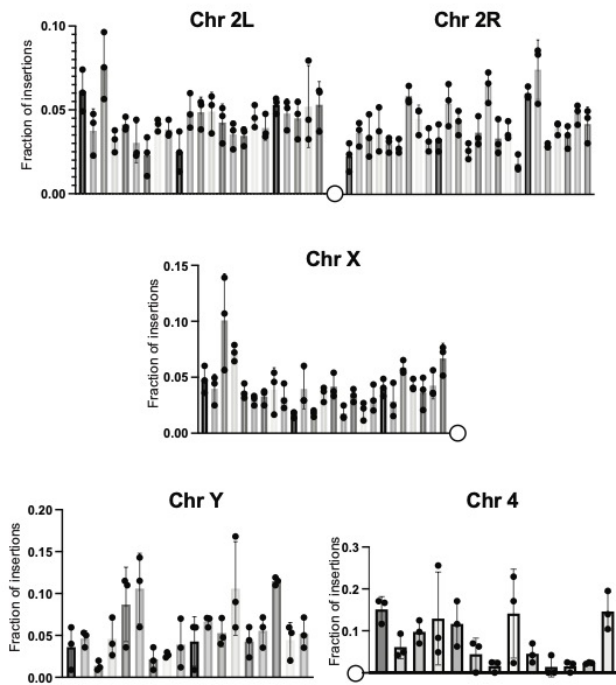

971

972 **Figure 3-S3. NGS mapping of ectopic *gypsy* insertions.** a) Schematic of targeted sequencing  
973 approach to map 5' junctions. b) The fraction of insertions that map to each one megabase region of  
974 the reference genome for the arms of chromosome 2 and the X chromosome are plotted. For the Y  
975 chromosome, each bin represents 200K bases. For the chromosome 4, each bin represents 100K  
976 bases. For all histograms, the bars represent the average of three biological replicates. Error bars  
977 indicate the standard deviation and the filled circles indicate the individual measurements.

978 **Figure 4 Supplemental 1. Female parental UAS-gypsy control has shortened**  
979 **lifespan.**

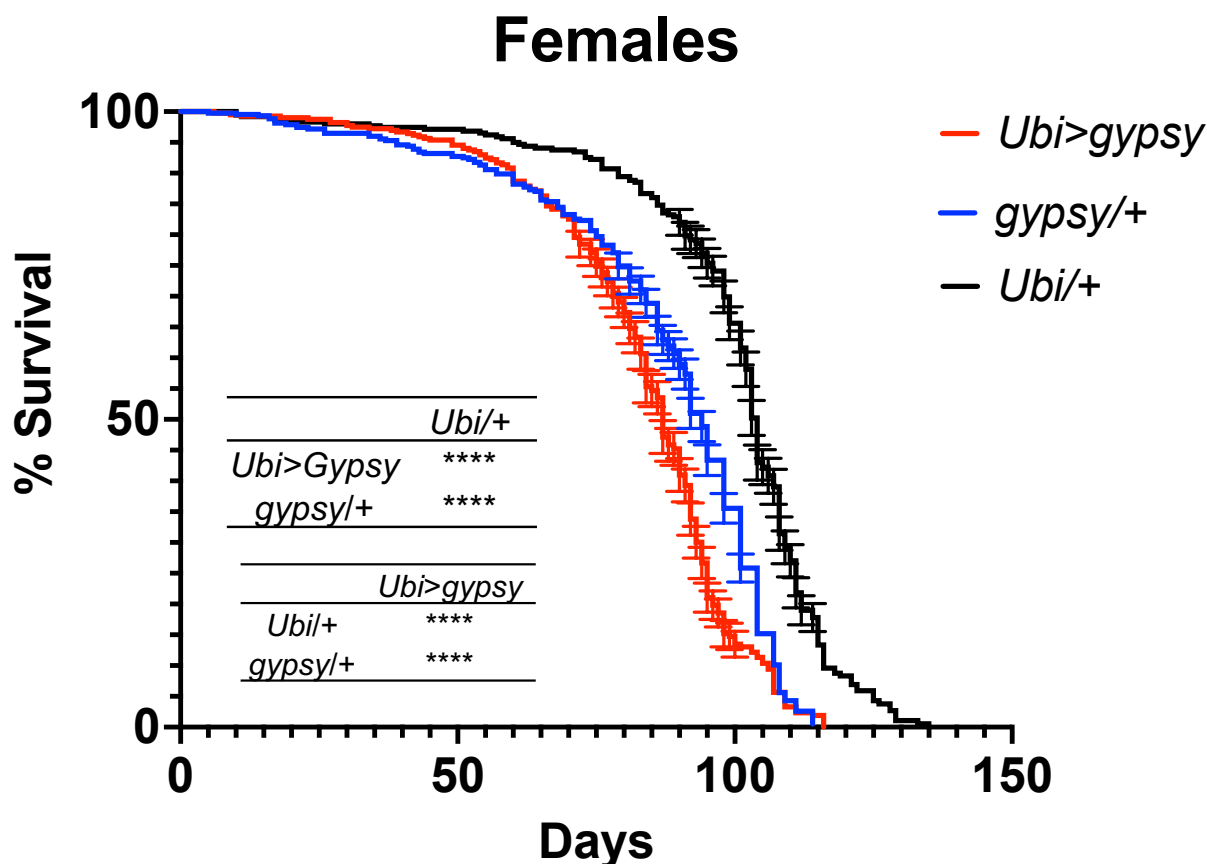

| Genotype            | Median survival | N   |
|---------------------|-----------------|-----|
| <i>Ubi&gt;gypsy</i> | 87 days         | 257 |
| <i>gypsy/+</i>      | 94 days         | 306 |
| <i>Ubi/+</i>        | 104 days        | 231 |

980

981 **Figure 4-S1. Female parental UAS-gypsy control has shortened lifespan.** a) Survival curves of  
982 female flies expressing *gypsy* under the control of *Ubiquitin Gal4* (Red) and the parental controls:  
983 *gypsy/+* (Blue) and *Ubi/+* (Black). Data represents 3 biological replicates (independent cohorts done  
984 at different times of year), error bars SE. \*\*\*\* p value <0.0001, Log-rank test.

985 **Figure 4 Supplemental 2. Male vs female parental UAS *gypsy* control.**

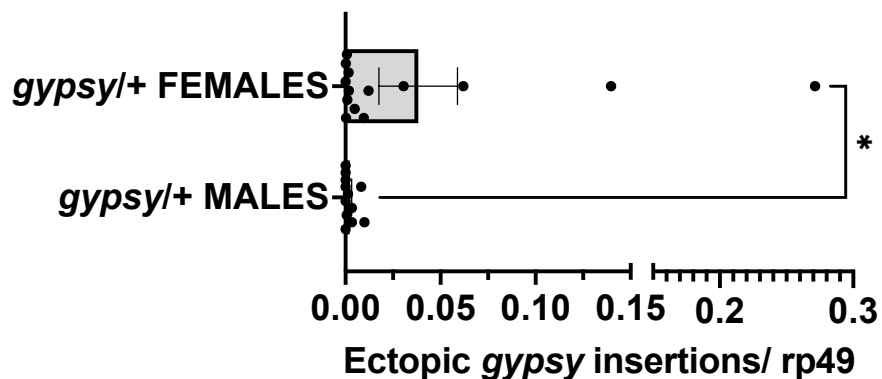

986

987 **Figure 4-S2. Male vs female parental UAS *gypsy* control.** Ectopic *gypsy* provirus insertion  
988 junctions are detected. Data are represented as means  $\pm$  SEM. *gypsy/+* gDNA from dead flies  
989 across the whole lifespan curve was assayed. All dead flies were assayed. Each dot represents a  
990 pool of 5-10 dead flies. Two tailed Mann-Whitney test, \* p value 0.0177. Male n=12 pools. Female n  
991 = 14 pools.

992 **Figure 4 Supplemental 3. Head vs body *gypsy* parental control.**

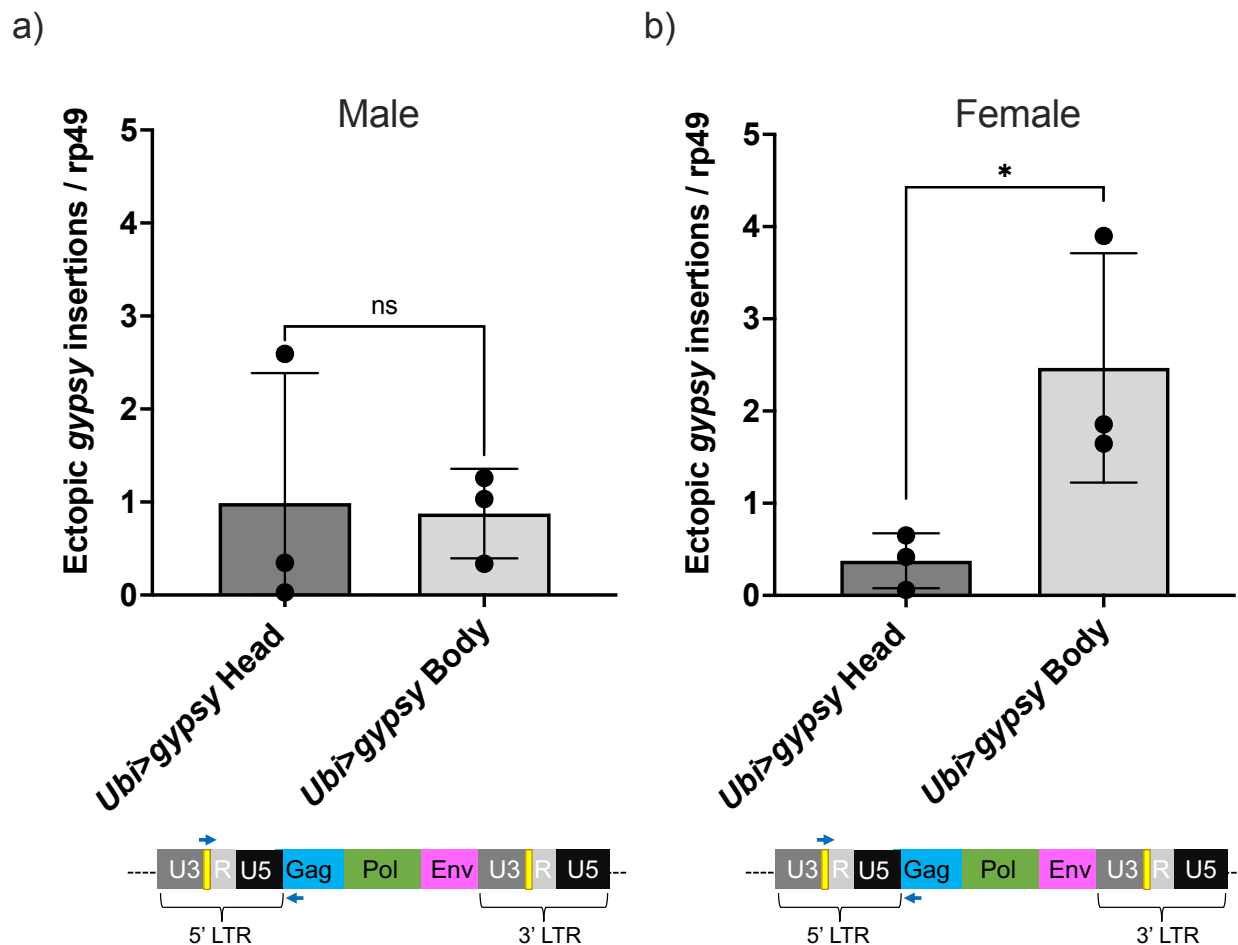

993

994 **Figure 4-S3. Head vs body *gypsy* parental control.** a-b) Ectopic *gypsy* provirus insertion junctions  
995 are detected. Data are represented as means  $\pm$  SD (3 biological replicates, each dot represents a  
996 pool of gDNA from 15-20 14d-old heads or bodies). a) Males. 2 tailed unpaired t test, ns p value  
997 >0.9. b) Females. 2 tailed unpaired t test, \* p value 0.047.

998 **Figure 7 Supplemental 1. Total activity**

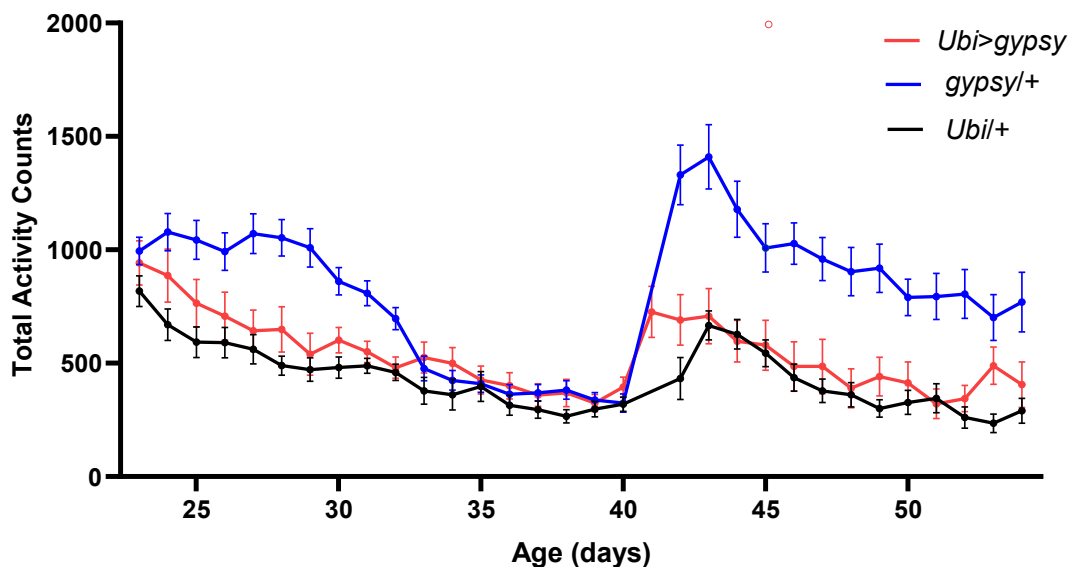

999

1000 **Figure 7-S1. Total activity counts of each genotype per day under 12:12 LD conditions.** The  
1001 sudden increase in activity around day 40 corresponds with the start of a new recording. UAS-  
1002 *gypsy/+* blue line. *Ubi>gypsy* red line. *Ubi/+* black line. N=26-32. Data are represented as means  $\pm$   
1003 SEM.

1004 **Figure 7 Supplemental 2. Negative geotaxis threshold optimization.**

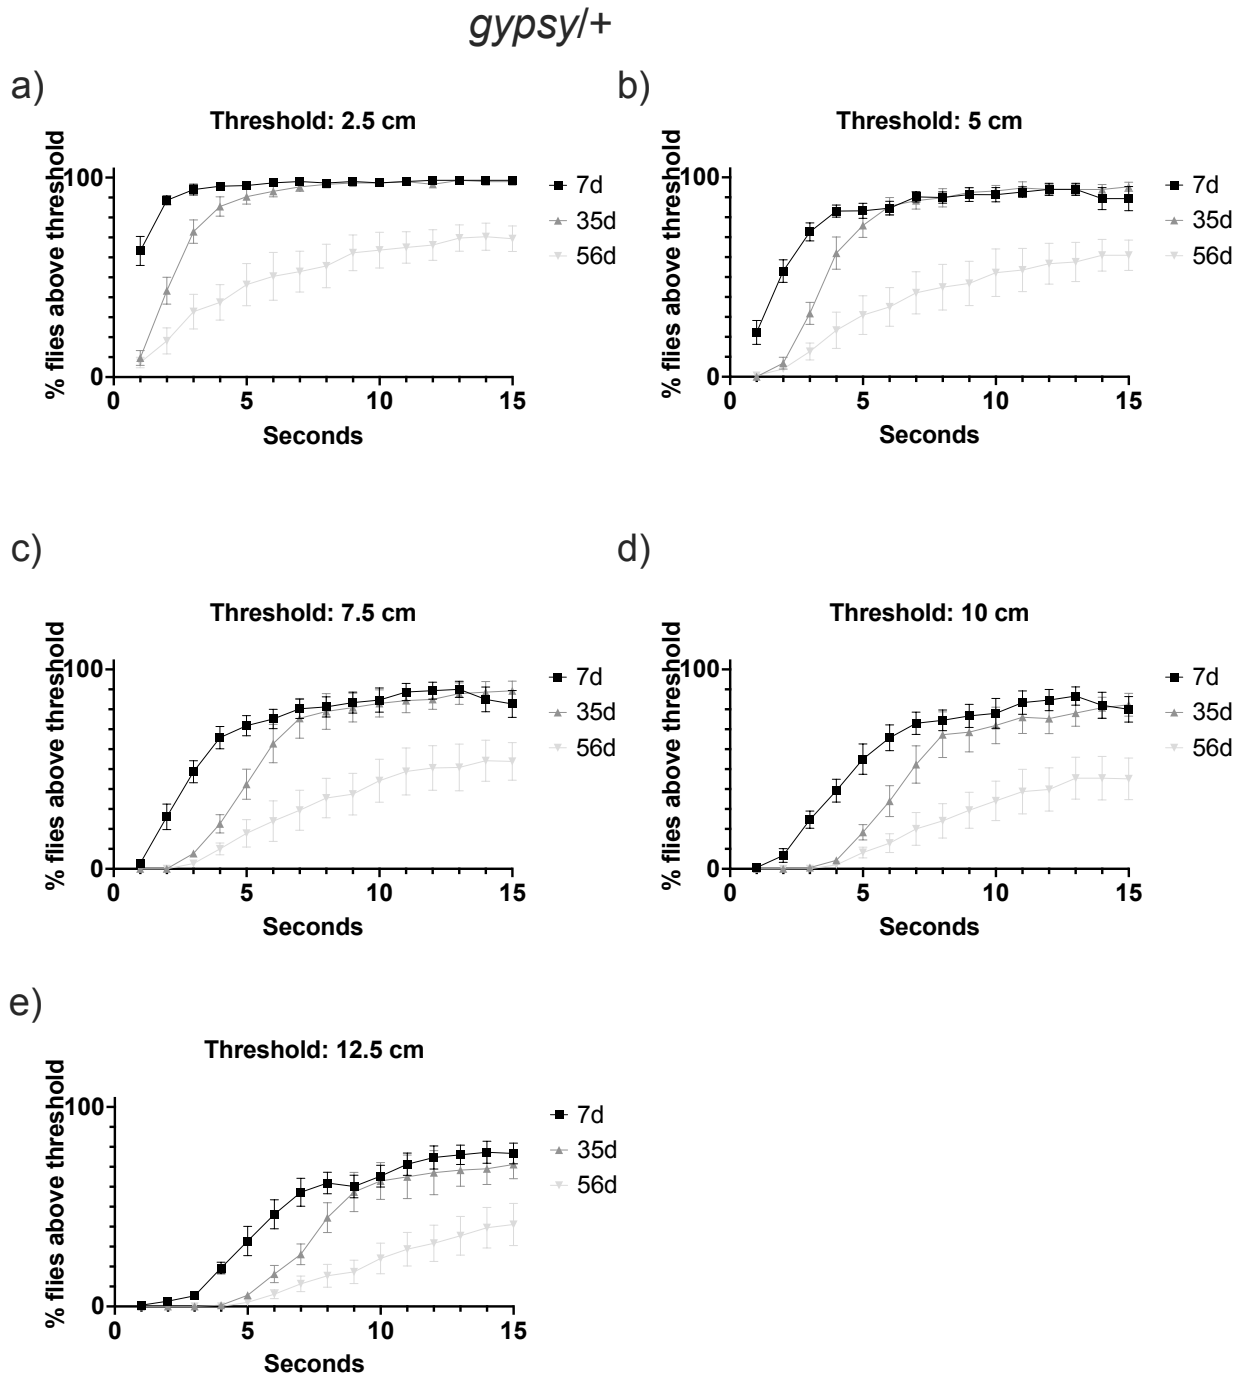

1005  
1006  
1007  
1008  
1009

**Figure 7 S2. Negative geotaxis threshold optimization.** Climbing behavior at 3 different ages (7 day old (black square), 35 day old (grey triangle), and 56 day old (light grey inverted triangle) of the UAS-*gypsy* parental control. Data are represented as means  $\pm$  SEM (5 biological replicates, 3 trials each).



1010 **Figure 7 Supplemental 3. Negative geotaxis.**

1011

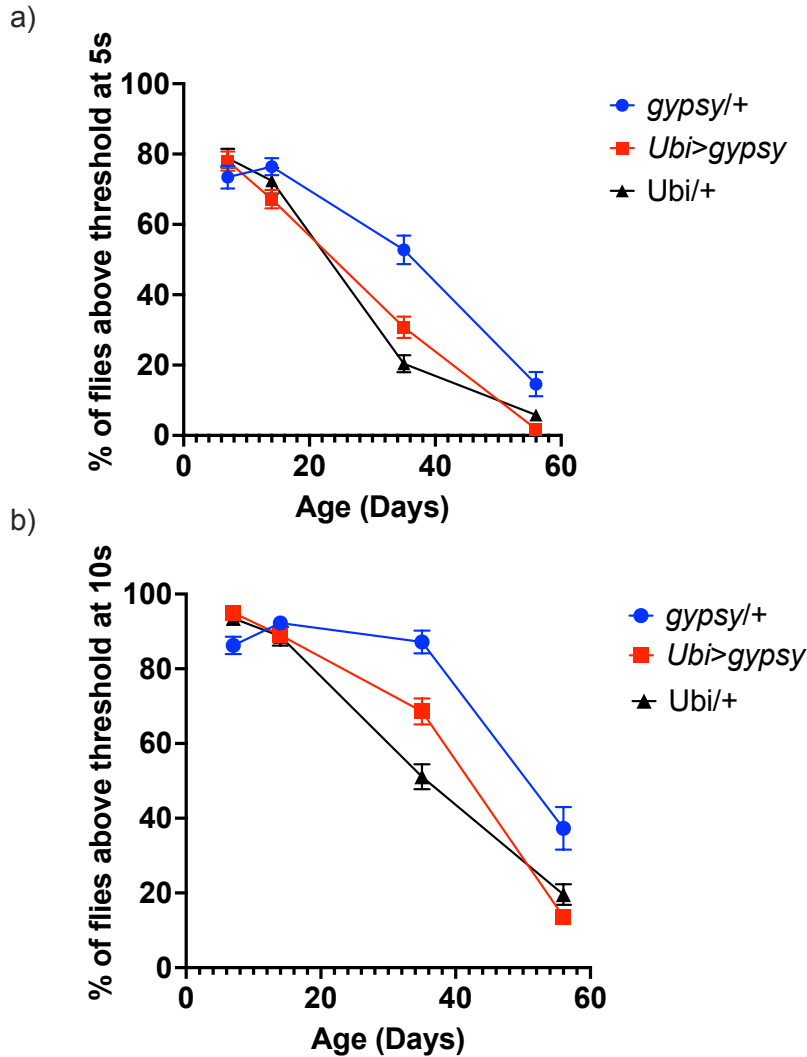

1012

1013 **Figure 7-S3. Negative geotaxis.** Threshold 7.5 cm. Data are represented as means  $\pm$  SEM (10

1014 biological replicates, 10 male flies each, 5 trials per replicate). *gypsy/+* blue circles. *Ubi>gypsy* red

1015 squares. *Ubi/+* black triangles. A) 5 seconds. B) 10 seconds. Slopes were analyzed by simple linear

1016 regression and determined to be not significantly different from each other.

1017 **Figure 1-Table supplement 1 (WT).** Wild type control TE expression. Counts have been normalized by median ratio  
 1018 normalization in DESeq2. Adjusted p value calculated by DESeq2 is provided.

| TE                    | wt_6d_1 | wt_6d_2 | wt_5d_3 | wt_30d_1 | wt_30d_2 | wt_30d_3 | adjusted p value | Fold Change | Class           |
|-----------------------|---------|---------|---------|----------|----------|----------|------------------|-------------|-----------------|
| <b>17.6</b>           | 57      | 108     | 49      | 29       | 100      | 98       | 9.97E-01         | 1.06        | Retrotransposon |
| <b>297</b>            | 722     | 1071    | 787     | 68       | 409      | 684      | 9.39E-01         | 0.45        | Retrotransposon |
| <b>412</b>            | 136     | 174     | 95      | 61       | 126      | 238      | 9.97E-01         | 1.05        | Retrotransposon |
| <b>1731</b>           | 1432    | 2236    | 1051    | 3987     | 6466     | 7530     | 2.10E-04         | 3.81        | Retrotransposon |
| <b>ACCORD</b>         | 49      | 436     | 21      | 1        | 40       | 157      | 9.97E-01         | 0.39        | Retrotransposon |
| <b>aurora-element</b> | 41      | 27      | 27      | 35       | 29       | 28       | 9.97E-01         | 0.98        | Retrotransposon |
| <b>BAGGINS</b>        | 28      | 43      | 19      | 12       | 31       | 60       | 9.97E-01         | 1.14        | Retrotransposon |
| <b>Beagle</b>         | 486     | 391     | 455     | 343      | 400      | 369      | 9.97E-01         | 0.83        | Retrotransposon |
| <b>Beagle2</b>        | 23      | 56      | 11      | 11       | 25       | 54       | 9.97E-01         | 0.99        | Retrotransposon |
| <b>Bel</b>            | 1000    | 1365    | 314     | 254      | 882      | 1594     | 9.97E-01         | 1.02        | Retrotransposon |
| <b>BLOOD</b>          | 488     | 578     | 505     | 135      | 499      | 381      | 9.97E-01         | 0.65        | Retrotransposon |
| <b>BS</b>             | 63      | 84      | 27      | 26       | 49       | 66       | 9.97E-01         | 0.81        | Retrotransposon |
| <b>BS3</b>            | 66      | 60      | 23      | 65       | 59       | 52       | 9.97E-01         | 1.17        | Retrotransposon |
| <b>Burdock</b>        | 1044    | 1138    | 704     | 900      | 1811     | 1675     | 9.96E-01         | 1.52        | Retrotransposon |
| <b>CIRC</b>           | 43      | 41      | 17      | 14       | 45       | 73       | 9.97E-01         | 1.30        | Retrotransposon |
| <b>COPIA</b>          | 78001   | 138845  | 60568   | 95444    | 238381   | 250318   | 6.22E-01         | 2.11        | Retrotransposon |
| <b>CR1A</b>           | 333     | 463     | 124     | 142      | 344      | 419      | 9.97E-01         | 0.98        | Retrotransposon |
| <b>Diver</b>          | 131     | 127     | 19      | 7        | 71       | 121      | 9.97E-01         | 0.72        | Retrotransposon |
| <b>DIVER2</b>         | 62      | 51      | 10      | 4        | 33       | 46       | 9.97E-01         | 0.68        | Retrotransposon |
| <b>DM_ROO</b>         | 1320    | 1461    | 521     | 898      | 1373     | 1649     | 9.97E-01         | 1.19        | Retrotransposon |
| <b>DM88</b>           | 57      | 62      | 16      | 22       | 50       | 66       | 9.97E-01         | 1.02        | Retrotransposon |
| <b>DMGYPF1A</b>       | 777     | 984     | 454     | 311      | 644      | 862      | 9.97E-01         | 0.82        | Retrotransposon |
| <b>DOC</b>            | 2501    | 4171    | 1162    | 480      | 2344     | 3052     | 9.97E-01         | 0.75        | Retrotransposon |
| <b>DOC2</b>           | 241     | 303     | 40      | 52       | 151      | 248      | 9.97E-01         | 0.77        | Retrotransposon |

|                  |      |      |     |     |      |      |          |      |                 |
|------------------|------|------|-----|-----|------|------|----------|------|-----------------|
| <b>DOC3</b>      | 114  | 134  | 63  | 84  | 146  | 138  | 9.97E-01 | 1.18 | Retrotransposon |
| <b>DOC4</b>      | 105  | 177  | 88  | 525 | 422  | 359  | 1.00E-05 | 3.52 | Retrotransposon |
| <b>DOC5</b>      | 8    | 18   | 9   | 14  | 26   | 36   | 1.00E+00 | 2.14 | Retrotransposon |
| <b>F-element</b> | 392  | 646  | 138 | 74  | 304  | 594  | 9.97E-01 | 0.83 | Retrotransposon |
| <b>Flea</b>      | 1122 | 1506 | 397 | 310 | 1042 | 1294 | 9.97E-01 | 0.87 | Retrotransposon |
| <b>FROGGER</b>   | 59   | 62   | 6   | 7   | 42   | 57   | 9.97E-01 | 0.84 | Retrotransposon |
| <b>FW2</b>       | 38   | 44   | 15  | 19  | 45   | 41   | 9.97E-01 | 1.08 | Retrotransposon |
| <b>FW3</b>       | 43   | 38   | 27  | 34  | 36   | 42   | 9.97E-01 | 1.04 | Retrotransposon |
| <b>G2</b>        | 87   | 71   | 33  | 28  | 56   | 73   | 9.97E-01 | 0.82 | Retrotransposon |
| <b>G3</b>        | 15   | 21   | 12  | 4   | 22   | 23   | 1.00E+00 | 1.02 | Retrotransposon |
| <b>G4</b>        | 129  | 142  | 74  | 73  | 130  | 160  | 9.97E-01 | 1.05 | Retrotransposon |
| <b>G5</b>        | 57   | 74   | 11  | 27  | 70   | 72   | 9.97E-01 | 1.19 | Retrotransposon |
| <b>G5A</b>       | 184  | 185  | 155 | 147 | 175  | 218  | 9.97E-01 | 1.03 | Retrotransposon |
| <b>G6</b>        | 122  | 237  | 253 | 22  | 79   | 59   | 8.30E-03 | 0.26 | Retrotransposon |
| <b>Gate</b>      | 252  | 288  | 69  | 240 | 563  | 881  | 3.95E-01 | 2.76 | Retrotransposon |
| <b>GTWIN</b>     | 28   | 78   | 13  | 36  | 70   | 62   | 9.97E-01 | 1.40 | Retrotransposon |
| <b>GYPSY10</b>   | 179  | 225  | 102 | 110 | 197  | 228  | 9.97E-01 | 1.06 | Retrotransposon |
| <b>GYPSY11</b>   | 24   | 20   | 4   | 12  | 11   | 15   | 1.00E+00 | 0.80 | Retrotransposon |
| <b>GYPSY2</b>    | 29   | 33   | 13  | 23  | 36   | 38   | 9.97E-01 | 1.26 | Retrotransposon |
| <b>GYPSY4</b>    | 52   | 91   | 33  | 35  | 68   | 81   | 9.97E-01 | 1.05 | Retrotransposon |
| <b>GYPSY5</b>    | 22   | 33   | 10  | 10  | 38   | 21   | 1.00E+00 | 1.05 | Retrotransposon |
| <b>GYPSY6</b>    | 25   | 7    | 13  | 17  | 18   | 13   | 1.00E+00 | 1.04 | Retrotransposon |
| <b>GYPSY8</b>    | 53   | 29   | 17  | 25  | 54   | 70   | 9.97E-01 | 1.50 | Retrotransposon |
| <b>GYPSY9</b>    | 59   | 56   | 26  | 33  | 52   | 43   | 9.97E-01 | 0.91 | Retrotransposon |
| <b>HeT-A</b>     | 1110 | 1252 | 658 | 729 | 1253 | 1494 | 9.97E-01 | 1.15 | Retrotransposon |
| <b>I-element</b> | 270  | 552  | 105 | 85  | 349  | 509  | 9.97E-01 | 1.02 | Retrotransposon |
| <b>Idefix</b>    | 141  | 250  | 86  | 105 | 239  | 309  | 9.97E-01 | 1.36 | Retrotransposon |
| <b>INVADER</b>   | 49   | 63   | 18  | 31  | 53   | 66   | 9.97E-01 | 1.15 | Retrotransposon |

|                     |      |      |      |      |      |      |          |      |                 |
|---------------------|------|------|------|------|------|------|----------|------|-----------------|
| <b>INVADER2</b>     | 47   | 145  | 19   | 22   | 103  | 158  | 9.97E-01 | 1.34 | Retrotransposon |
| <b>INVADER3</b>     | 70   | 123  | 67   | 140  | 127  | 128  | 9.23E-01 | 1.51 | Retrotransposon |
| <b>INVADER4</b>     | 36   | 29   | 10   | 35   | 47   | 73   | 8.52E-01 | 2.07 | Retrotransposon |
| <b>IVK</b>          | 95   | 167  | 16   | 18   | 156  | 218  | 9.97E-01 | 1.40 | Retrotransposon |
| <b>Jockey</b>       | 644  | 705  | 330  | 316  | 556  | 769  | 9.97E-01 | 0.98 | Retrotransposon |
| <b>Jockey_1</b>     | 282  | 386  | 212  | 263  | 334  | 405  | 9.97E-01 | 1.14 | Retrotransposon |
| <b>JOCKEY2</b>      | 219  | 196  | 108  | 201  | 199  | 166  | 9.97E-01 | 1.08 | Retrotransposon |
| <b>JUAN</b>         | 87   | 82   | 23   | 17   | 73   | 77   | 9.97E-01 | 0.87 | Retrotransposon |
| <b>Max-element</b>  | 2543 | 2091 | 1407 | 2719 | 2744 | 3012 | 9.96E-01 | 1.40 | Retrotransposon |
| <b>MDG3</b>         | 288  | 418  | 104  | 143  | 437  | 505  | 9.97E-01 | 1.34 | Retrotransposon |
| <b>MGD1</b>         | 298  | 346  | 134  | 214  | 382  | 580  | 9.97E-01 | 1.51 | Retrotransposon |
| <b>Microcopia</b>   | 19   | 19   | 5    | 11   | 25   | 30   | 1.00E+00 | 1.52 | Retrotransposon |
| <b>ninja</b>        | 43   | 39   | 26   | 44   | 52   | 67   | 9.97E-01 | 1.52 | Retrotransposon |
| <b>OPUS</b>         | 1991 | 2046 | 588  | 1730 | 3516 | 4090 | 8.73E-01 | 2.02 | Retrotransposon |
| <b>QBERT</b>        | 46   | 51   | 19   | 43   | 73   | 82   | 9.97E-01 | 1.68 | Retrotransposon |
| <b>QUASIMODO</b>    | 47   | 53   | 17   | 17   | 39   | 62   | 9.97E-01 | 1.00 | Retrotransposon |
| <b>R1-2</b>         | 21   | 23   | 11   | 12   | 11   | 17   | 1.00E+00 | 0.73 | Retrotransposon |
| <b>R1A1-element</b> | 7    | 27   | 11   | 28   | 26   | 25   | 1.00E+00 | 1.73 | Retrotransposon |
| <b>ROOA_LTR</b>     | 382  | 444  | 69   | 144  | 454  | 1048 | 9.97E-01 | 1.84 | Retrotransposon |
| <b>ROVER</b>        | 64   | 133  | 106  | 127  | 289  | 348  | 1.44E-01 | 2.52 | Retrotransposon |
| <b>Rt1a</b>         | 32   | 54   | 50   | 11   | 43   | 36   | 9.97E-01 | 0.67 | Retrotransposon |
| <b>RT1B</b>         | 179  | 193  | 47   | 110  | 227  | 167  | 9.97E-01 | 1.20 | Retrotransposon |
| <b>RT1C</b>         | 24   | 27   | 7    | 17   | 27   | 20   | 1.00E+00 | 1.07 | Retrotransposon |
| <b>S-element</b>    | 102  | 134  | 37   | 69   | 97   | 136  | 9.97E-01 | 1.10 | Retrotransposon |
| <b>S2</b>           | 21   | 29   | 17   | 25   | 23   | 33   | 1.00E+00 | 1.20 | Retrotransposon |
| <b>SPRINGER</b>     | 723  | 876  | 409  | 655  | 1035 | 1186 | 9.97E-01 | 1.43 | Retrotransposon |
| <b>STALKER2</b>     | 450  | 745  | 348  | 130  | 178  | 214  | 1.07E-03 | 0.34 | Retrotransposon |
| <b>TABOR</b>        | 149  | 240  | 54   | 71   | 169  | 258  | 9.97E-01 | 1.12 | Retrotransposon |

|                  |      |      |     |     |      |      |          |      |                 |
|------------------|------|------|-----|-----|------|------|----------|------|-----------------|
| <b>TARTC</b>     | 106  | 189  | 51  | 34  | 104  | 141  | 9.97E-01 | 0.81 | Retrotransposon |
| <b>TOM1_LTR</b>  | 72   | 75   | 91  | 110 | 93   | 89   | 9.97E-01 | 1.23 | Retrotransposon |
| <b>Transpac</b>  | 569  | 833  | 296 | 273 | 953  | 973  | 9.97E-01 | 1.29 | Retrotransposon |
| <b>X-ELEMENT</b> | 67   | 115  | 21  | 15  | 58   | 102  | 9.97E-01 | 0.86 | Retrotransposon |
| <b>ZAM</b>       | 24   | 41   | 29  | 7   | 34   | 28   | 9.97E-01 | 0.73 | Retrotransposon |
| <b>1360</b>      | 1126 | 1263 | 543 | 916 | 1226 | 1333 | 9.97E-01 | 1.18 | DNA             |
| <b>BARI1</b>     | 82   | 78   | 45  | 64  | 99   | 77   | 9.97E-01 | 1.16 | DNA             |
| <b>Hobo</b>      | 365  | 463  | 237 | 139 | 384  | 390  | 9.97E-01 | 0.86 | DNA             |
| <b>Pogo</b>      | 720  | 678  | 801 | 792 | 889  | 741  | 9.97E-01 | 1.10 | DNA             |
| <b>HB</b>        | 161  | 215  | 40  | 53  | 167  | 173  | 9.97E-01 | 0.94 | DNA             |
| <b>FB</b>        | 200  | 185  | 146 | 197 | 237  | 244  | 9.97E-01 | 1.27 | DNA             |
| <b>Hopper</b>    | 24   | 21   | 19  | 16  | 31   | 22   | 1.00E+00 | 1.05 | DNA             |
| <b>INE1</b>      | 164  | 208  | 96  | 104 | 196  | 207  | 9.97E-01 | 1.08 | DNA             |
| <b>MARINER2</b>  | 97   | 78   | 69  | 104 | 103  | 96   | 9.97E-01 | 1.24 | DNA             |
| <b>P-element</b> | 432  | 405  | 285 | 322 | 421  | 314  | 9.97E-01 | 0.94 | DNA             |
| <b>TC1</b>       | 126  | 156  | 29  | 43  | 90   | 147  | 9.97E-01 | 0.89 | DNA             |
| <b>TC1-2</b>     | 59   | 133  | 55  | 44  | 103  | 161  | 9.97E-01 | 1.24 | DNA             |
| <b>TRANSIB2</b>  | 123  | 102  | 49  | 71  | 115  | 117  | 9.97E-01 | 1.10 | DNA             |
| <b>TRANSIB3</b>  | 90   | 166  | 44  | 136 | 205  | 231  | 8.73E-01 | 1.90 | DNA             |
| <b>TRANSIB4</b>  | 7    | 20   | 9   | 7   | 11   | 20   | 1.00E+00 | 1.07 | DNA             |

1019  
1020  
1021  
1022  
1023  
1024  
1025  
1026  
1027

1028 **Figure 1-Table supplement 2 (FOXO null).** FOXO null TE expression. Counts have been normalized by median ratio  
 1029 normalization in DESeq2. Adjusted p value calculated by DESeq2 is provided.

| TE                    | $\Delta 94\_6d\_1$ | $\Delta 94\_6d\_2$ | $\Delta 94\_6d\_3$ | $\Delta 94\_31d\_1$ | $\Delta 94\_31d\_2$ | $\Delta 94\_30d\_3$ | adjusted p value | Fold Change | Class           |
|-----------------------|--------------------|--------------------|--------------------|---------------------|---------------------|---------------------|------------------|-------------|-----------------|
| <b>17.6</b>           | 28                 | 67                 | 58                 | 81                  | 90                  | 73                  | 1.50E-01         | 1.60        | Retrotransposon |
| <b>297</b>            | 194                | 506                | 164                | 949                 | 1081                | 270                 | 1.78E-01         | 2.66        | Retrotransposon |
| <b>412</b>            | 125                | 256                | 223                | 284                 | 129                 | 58                  | 6.18E-01         | 0.78        | Retrotransposon |
| <b>1731</b>           | 354                | 427                | 645                | 834                 | 1605                | 2198                | 5.00E-05         | 3.25        | Retrotransposon |
| <b>ACCORD</b>         | 1077               | 1259               | 1875               | 2598                | 4876                | 1519                | 2.47E-02         | 2.14        | Retrotransposon |
| <b>aurora-element</b> | 19                 | 16                 | 22                 | 9                   | 13                  | 22                  | 5.68E-01         | 0.74        | Retrotransposon |
| <b>BAGGINS</b>        | 33                 | 33                 | 29                 | 47                  | 40                  | 34                  | 4.82E-01         | 1.29        | Retrotransposon |
| <b>Beagle</b>         | 112                | 211                | 270                | 265                 | 328                 | 248                 | 2.41E-01         | 1.42        | Retrotransposon |
| <b>Beagle2</b>        | 8                  | 21                 | 25                 | 29                  | 53                  | 22                  | 1.51E-01         | 1.98        | Retrotransposon |
| <b>Bel</b>            | 873                | 732                | 620                | 1128                | 894                 | 1026                | 1.03E-01         | 1.37        | Retrotransposon |
| <b>BLOOD</b>          | 718                | 1574               | 1252               | 1974                | 1922                | 1453                | 1.33E-01         | 1.51        | Retrotransposon |
| <b>BS</b>             | 272                | 288                | 307                | 395                 | 355                 | 536                 | 4.52E-02         | 1.48        | Retrotransposon |
| <b>BS3</b>            | 47                 | 46                 | 54                 | 41                  | 38                  | 41                  | 5.29E-01         | 0.81        | Retrotransposon |
| <b>Burdock</b>        | 888                | 1094               | 1369               | 2049                | 2463                | 1434                | 1.26E-02         | 1.78        | Retrotransposon |
| <b>CIRC</b>           | 18                 | 30                 | 23                 | 51                  | 62                  | 56                  | 3.00E-03         | 2.43        | Retrotransposon |
| <b>COPIA</b>          | 23126              | 62779              | 58084              | 126439              | 166397              | 83807               | 3.97E-03         | 2.62        | Retrotransposon |
| <b>CR1A</b>           | 178                | 192                | 223                | 329                 | 334                 | 207                 | 8.83E-02         | 1.47        | Retrotransposon |
| <b>Diver</b>          | 58                 | 39                 | 55                 | 43                  | 42                  | 62                  | 9.25E-01         | 0.96        | Retrotransposon |
| <b>DIVER2</b>         | 18                 | 32                 | 26                 | 30                  | 26                  | 20                  | 9.54E-01         | 1.03        | Retrotransposon |
| <b>DM_ROO</b>         | 510                | 1014               | 1140               | 1350                | 1226                | 769                 | 5.00E-01         | 1.26        | Retrotransposon |
| <b>DM88</b>           | 38                 | 54                 | 43                 | 44                  | 42                  | 20                  | 5.81E-01         | 0.80        | Retrotransposon |
| <b>DMGYPF1A</b>       | 166                | 141                | 165                | 274                 | 300                 | 277                 | 4.80E-04         | 1.80        | Retrotransposon |
| <b>DOC</b>            | 2636               | 1966               | 2108               | 3450                | 3628                | 2834                | 4.25E-02         | 1.48        | Retrotransposon |
| <b>DOC2</b>           | 225                | 167                | 177                | 211                 | 185                 | 176                 | 9.81E-01         | 1.00        | Retrotransposon |
| <b>DOC3</b>           | 231                | 276                | 326                | 462                 | 457                 | 333                 | 4.49E-02         | 1.51        | Retrotransposon |

|                  |      |      |      |      |      |     |          |      |                 |
|------------------|------|------|------|------|------|-----|----------|------|-----------------|
| <b>DOC4</b>      | 14   | 26   | 24   | 30   | 87   | 30  | 5.48E-02 | 2.32 | Retrotransposon |
| <b>DOC5</b>      | 11   | 26   | 35   | 33   | 25   | 17  | 8.96E-01 | 1.08 | Retrotransposon |
| <b>F-element</b> | 385  | 382  | 421  | 529  | 446  | 361 | 5.95E-01 | 1.13 | Retrotransposon |
| <b>Flea</b>      | 733  | 737  | 825  | 1431 | 1294 | 783 | 6.13E-02 | 1.53 | Retrotransposon |
| <b>FROGGER</b>   | 25   | 63   | 49   | 49   | 16   | 17  | 3.25E-01 | 0.61 | Retrotransposon |
| <b>FW2</b>       | 18   | 31   | 29   | 23   | 23   | 10  | 5.36E-01 | 0.74 | Retrotransposon |
| <b>FW3</b>       | 15   | 30   | 30   | 21   | 13   | 10  | 2.82E-01 | 0.60 | Retrotransposon |
| <b>G2</b>        | 58   | 39   | 49   | 61   | 71   | 56  | 4.40E-01 | 1.28 | Retrotransposon |
| <b>G3</b>        | 13   | 17   | 28   | 12   | 7    | 9   | 1.69E-01 | 0.51 | Retrotransposon |
| <b>G4</b>        | 71   | 145  | 124  | 126  | 74   | 76  | 5.83E-01 | 0.82 | Retrotransposon |
| <b>G5</b>        | 98   | 73   | 93   | 97   | 88   | 101 | 8.04E-01 | 1.08 | Retrotransposon |
| <b>G5A</b>       | 138  | 158  | 182  | 169  | 135  | 126 | 7.02E-01 | 0.90 | Retrotransposon |
| <b>G6</b>        | 24   | 21   | 31   | 37   | 59   | 57  | 2.96E-02 | 2.02 | Retrotransposon |
| <b>Gate</b>      | 166  | 121  | 166  | 362  | 484  | 472 | 1.00E-08 | 2.90 | Retrotransposon |
| <b>GTWIN</b>     | 14   | 12   | 16   | 20   | 39   | 16  | 2.10E-01 | 1.78 | Retrotransposon |
| <b>GYPHY10</b>   | 90   | 135  | 101  | 118  | 84   | 83  | 6.83E-01 | 0.88 | Retrotransposon |
| <b>GYPHY11</b>   | 10   | 7    | 24   | 12   | 11   | 10  | 1.00E+00 | 0.81 | Retrotransposon |
| <b>GYPHY2</b>    | 29   | 29   | 21   | 36   | 37   | 42  | 2.88E-01 | 1.46 | Retrotransposon |
| <b>GYPHY4</b>    | 41   | 50   | 56   | 67   | 82   | 49  | 3.59E-01 | 1.35 | Retrotransposon |
| <b>GYPHY5</b>    | 4    | 6    | 11   | 16   | 15   | 8   | 1.00E+00 | 1.85 | Retrotransposon |
| <b>GYPHY6</b>    | 12   | 20   | 25   | 27   | 26   | 17  | 6.08E-01 | 1.28 | Retrotransposon |
| <b>GYPHY8</b>    | 38   | 25   | 28   | 12   | 25   | 31  | 5.43E-01 | 0.75 | Retrotransposon |
| <b>GYPHY9</b>    | 37   | 32   | 54   | 42   | 13   | 13  | 2.27E-01 | 0.56 | Retrotransposon |
| <b>HeT-A</b>     | 1033 | 1077 | 1180 | 1182 | 1283 | 798 | 9.78E-01 | 0.99 | Retrotransposon |
| <b>I-element</b> | 224  | 201  | 197  | 418  | 372  | 208 | 5.26E-02 | 1.61 | Retrotransposon |
| <b>Idefix</b>    | 72   | 136  | 193  | 243  | 352  | 127 | 1.08E-01 | 1.81 | Retrotransposon |
| <b>INVADER</b>   | 46   | 57   | 42   | 35   | 34   | 29  | 2.34E-01 | 0.68 | Retrotransposon |
| <b>INVADER2</b>  | 38   | 66   | 77   | 140  | 192  | 118 | 9.10E-04 | 2.50 | Retrotransposon |

|                     |      |      |      |      |      |      |          |      |                 |
|---------------------|------|------|------|------|------|------|----------|------|-----------------|
| <b>INVADER3</b>     | 150  | 176  | 185  | 241  | 336  | 196  | 7.21E-02 | 1.51 | Retrotransposon |
| <b>INVADER4</b>     | 19   | 34   | 37   | 61   | 77   | 47   | 2.58E-02 | 2.07 | Retrotransposon |
| <b>IVK</b>          | 53   | 55   | 45   | 125  | 225  | 224  | 1.00E-07 | 3.73 | Retrotransposon |
| <b>Jockey</b>       | 848  | 596  | 653  | 831  | 1122 | 1106 | 6.34E-02 | 1.46 | Retrotransposon |
| <b>Jockey_1</b>     | 579  | 539  | 644  | 519  | 542  | 409  | 3.68E-01 | 0.83 | Retrotransposon |
| <b>JOCKEY2</b>      | 99   | 152  | 146  | 98   | 83   | 47   | 5.90E-02 | 0.58 | Retrotransposon |
| <b>JUAN</b>         | 80   | 96   | 97   | 165  | 265  | 133  | 4.37E-03 | 2.07 | Retrotransposon |
| <b>Max-element</b>  | 859  | 779  | 364  | 1190 | 807  | 781  | 3.00E-01 | 1.39 | Retrotransposon |
| <b>MDG3</b>         | 712  | 708  | 553  | 925  | 753  | 408  | 8.72E-01 | 1.06 | Retrotransposon |
| <b>MGD1</b>         | 178  | 350  | 425  | 553  | 833  | 473  | 1.94E-02 | 1.95 | Retrotransposon |
| <b>Microcopia</b>   | 35   | 36   | 43   | 44   | 45   | 21   | 9.68E-01 | 0.98 | Retrotransposon |
| <b>ninja</b>        | 33   | 28   | 39   | 17   | 33   | 23   | 4.44E-01 | 0.73 | Retrotransposon |
| <b>OPUS</b>         | 1450 | 1511 | 1833 | 2025 | 2093 | 2767 | 6.66E-02 | 1.44 | Retrotransposon |
| <b>QBERT</b>        | 17   | 30   | 31   | 36   | 42   | 47   | 1.74E-01 | 1.63 | Retrotransposon |
| <b>QUASIMODO</b>    | 40   | 66   | 63   | 91   | 100  | 42   | 3.90E-01 | 1.39 | Retrotransposon |
| <b>R1-2</b>         | 19   | 14   | 18   | 15   | 3    | 7    | 1.91E-01 | 0.50 | Retrotransposon |
| <b>R1A1-element</b> | 44   | 28   | 30   | 48   | 48   | 55   | 2.53E-01 | 1.46 | Retrotransposon |
| <b>ROOA_LTR</b>     | 56   | 60   | 88   | 209  | 276  | 150  | 1.00E-05 | 3.13 | Retrotransposon |
| <b>ROVER</b>        | 55   | 110  | 156  | 146  | 200  | 71   | 5.52E-01 | 1.30 | Retrotransposon |
| <b>Rt1a</b>         | 27   | 41   | 32   | 55   | 54   | 30   | 3.64E-01 | 1.41 | Retrotransposon |
| <b>RT1B</b>         | 136  | 171  | 167  | 183  | 212  | 143  | 6.19E-01 | 1.14 | Retrotransposon |
| <b>RT1C</b>         | 26   | 19   | 25   | 19   | 19   | 20   | 6.90E-01 | 0.83 | Retrotransposon |
| <b>S-element</b>    | 89   | 150  | 124  | 163  | 202  | 100  | 4.42E-01 | 1.28 | Retrotransposon |
| <b>S2</b>           | 17   | 20   | 31   | 26   | 51   | 15   | 5.35E-01 | 1.38 | Retrotransposon |
| <b>SPRINGER</b>     | 1363 | 1611 | 1080 | 2201 | 1600 | 1522 | 2.48E-01 | 1.31 | Retrotransposon |
| <b>STALKER2</b>     | 55   | 145  | 139  | 115  | 112  | 79   | 8.19E-01 | 0.91 | Retrotransposon |
| <b>TABOR</b>        | 41   | 126  | 162  | 131  | 106  | 54   | 8.24E-01 | 0.89 | Retrotransposon |
| <b>TARTC</b>        | 56   | 45   | 72   | 107  | 183  | 94   | 5.13E-03 | 2.22 | Retrotransposon |



|                  |     |      |      |      |      |     |          |      |                 |
|------------------|-----|------|------|------|------|-----|----------|------|-----------------|
| <b>TOM1_LTR</b>  | 28  | 52   | 76   | 66   | 105  | 69  | 2.58E-01 | 1.53 | Retrotransposon |
| <b>Transpac</b>  | 458 | 1106 | 1447 | 2514 | 2842 | 820 | 2.94E-01 | 2.05 | Retrotransposon |
| <b>X-ELEMENT</b> | 68  | 45   | 55   | 62   | 53   | 55  | 9.78E-01 | 1.01 | Retrotransposon |
| <b>ZAM</b>       | 29  | 35   | 37   | 27   | 21   | 27  | 4.38E-01 | 0.74 | Retrotransposon |
| <b>1360</b>      | 416 | 775  | 710  | 1240 | 1224 | 734 | 4.76E-02 | 1.68 | DNA             |
| <b>BARI1</b>     | 27  | 46   | 40   | 70   | 67   | 48  | 1.12E-01 | 1.65 | DNA             |
| <b>Hobo</b>      | 90  | 185  | 138  | 175  | 188  | 155 | 4.45E-01 | 1.26 | DNA             |
| <b>Pogo</b>      | 216 | 500  | 487  | 612  | 774  | 365 | 2.69E-01 | 1.46 | DNA             |
| <b>HB</b>        | 78  | 148  | 151  | 178  | 200  | 157 | 2.08E-01 | 1.42 | DNA             |
| <b>FB</b>        | 98  | 177  | 215  | 152  | 259  | 105 | 9.03E-01 | 1.06 | DNA             |
| <b>Hopper</b>    | 9   | 37   | 20   | 30   | 41   | 23  | 4.70E-01 | 1.45 | DNA             |
| <b>INE1</b>      | 88  | 126  | 133  | 168  | 173  | 109 | 3.43E-01 | 1.31 | DNA             |
| <b>MARINER2</b>  | 84  | 113  | 114  | 98   | 81   | 89  | 6.01E-01 | 0.86 | DNA             |
| <b>P-element</b> | 339 | 561  | 593  | 739  | 775  | 618 | 1.21E-01 | 1.43 | DNA             |
| <b>TC1</b>       | 89  | 112  | 75   | 144  | 171  | 58  | 4.30E-01 | 1.35 | DNA             |
| <b>TC1-2</b>     | 84  | 111  | 115  | 141  | 166  | 101 | 3.10E-01 | 1.32 | DNA             |
| <b>TRANSIB2</b>  | 35  | 86   | 70   | 61   | 52   | 23  | 4.49E-01 | 0.71 | DNA             |
| <b>TRANSIB3</b>  | 37  | 102  | 77   | 168  | 194  | 92  | 2.99E-02 | 2.12 | DNA             |
| <b>TRANSIB4</b>  | 14  | 14   | 12   | 23   | 17   | 9   | 7.19E-01 | 1.22 | DNA             |

1030
